1

2

## Serum albumin maintains Wnt water-solubility and activity

3

4 Joo Hye Yeo<sup>1, †</sup>, Soon Sung Kwon<sup>2, †</sup>, Jiyeon Chae<sup>2, †</sup>, Ines Kusen<sup>2</sup>, Jaeun Han<sup>2</sup>, Ju Yeon Lim<sup>3</sup>,

5 Jae-Ho Cheong<sup>3</sup>, Taeil Kim<sup>4</sup>, Yang Ouk Jung<sup>5, \*</sup>, Chul Hoon Kim<sup>2,6,\*</sup>, Jinu Lee<sup>1, \*</sup>

6 <sup>1</sup>College of Pharmacy, Yonsei Institute of Pharmaceutical Sciences, Yonsei University,

7 Incheon 21983, Korea

8 <sup>2</sup>Department of Pharmacology, BK21 PLUS Project for Medical Sciences, Brain Research

9 Institute, Yonsei University College of Medicine, Seoul 03722, Korea

10 <sup>3</sup>Department of General Surgery, BK21 PLUS Project for Medical Sciences, Yonsei

11 University College of Medicine, Seoul 03722, Korea

12 <sup>4</sup>Department of Internal Medicine, BK21 PLUS Project for Medical Sciences, Yonsei

13 University College of Medicine, Seoul 03722, Korea

14 <sup>5</sup>Interpark Bio Convergence Corp., Seoul 05835, Korea

15 <sup>6</sup>Severance Biomedical Science Institute, Yonsei University College of Medicine, Seoul

16 03722, Korea

17

18 †These authors contributed equally to this work.

19 \*Correspondence

20 kimhoon@yuhs.ac, yangouk.jung78@interpark.com, jinulee@yonsei.ac.kr

21 **Summary**

22 Wnt proteins regulate adult tissue homeostasis and repair by driving stem cell self-  
23 renewal and differentiation. High-performance Wnt preparations have enormous  
24 therapeutic potential, especially alongside various stem cell technologies. Currently, most  
25 of these Wnt preparations contain FBS or the detergent CHAPS to maintain Wnt solubility  
26 and activity. Recently, afamin was identified as a serum factor that solubilizes Wnt3a in  
27 conditioned media (CM), obviating the requirement for animal sera. Here, we report  
28 serum albumin (SA) is required for afamin-mediated solubilization of Wnt3a in CM.  
29 Moreover, SA-mediated solubilization of purified Wnt3a in tubes does not require afamin.  
30 This means conventional CHAPS-Wnt3a preparations can be modified into SA-purified  
31 Wnt3a (SA-pWnt3a) preparations by exchanging CHAPS for SA through dialysis. SA-  
32 pWnt3a preparations effectively promote the growth of human stem cell organoids. These  
33 data suggest SA as a physiological factor for maintaining Wnt3a activity in therapeutic  
34 applications.

## 35 **Introduction**

36 Wnt signaling plays important roles in the regulation of a variety of biological processes  
37 from development to tissue homeostasis<sup>1</sup>. The activation of Wnt/ $\beta$ -catenin signaling  
38 holds enormous therapeutic potential for many disease conditions in which tissue  
39 regeneration or the maintenance of tissue homeostasis would be beneficial<sup>2,3</sup>, but there  
40 is at least one key hurdle that must be resolved before Wnts can be developed as  
41 therapeutic proteins. Wnts are water-insoluble in their active form due to palmitoylation,  
42 a post-translational lipid modification<sup>4</sup>. This modification, however, is required for the  
43 maintenance of Wnt ligand activity because it facilitates the binding of Wnt to Frizzled  
44 (FZD), the receptor for secreted Wnts<sup>5</sup>. Consequently, the formation of an active and  
45 soluble Wnt preparation has thus far proven elusive. Additional molecules that help  
46 solubilize Wnts in their active acylated forms are necessary. Animal sera (e.g., fetal bovine  
47 serum or FBS) can maintain the activity and solubility of Wnt proteins<sup>6</sup>, but the use of  
48 animal serum in therapeutic applications can be hazardous for human patients. This is  
49 because it can provoke immunological reactions and even lead to pathogen transmission<sup>7-</sup>  
50 <sup>9</sup>. To minimize the contaminants from animal sera that have various biological functions,  
51 a method for purifying Wnts in their active form was developed<sup>4</sup>. In this method, Wnt  
52 proteins are purified from serum-containing Wnt-conditioned media (CM) using a  
53 detergent such as CHAPS during a multi-step column chromatography protocol<sup>4</sup>. The  
54 detergent, which remains in the resulting Wnt preparation, can be toxic to cells even at  
55 low concentrations<sup>10</sup>. Diluting the CHAPS to a point where it no longer affects cell viability,  
56 however, leads to a significant loss of Wnt activity. A Wnt3a-containing CM or a purified  
57 Wnt3a, solubilized and stabilized by a clearly defined physiological factor(s), is thus  
58 strongly preferred to a detergent- or animal sera-solubilized Wnt3a preparation.

59

60 Recently, many groups have become interested in developing a serum-free active Wnt  
61 preparation, even for *in vitro* use, due to the increasingly widespread employment of adult  
62 stem cell-derived human organoid culture technologies in biomedical research<sup>11</sup>. Since  
63 adult stem cell-derived organoid culture techniques were first established with intestinal  
64 cells about 10 years ago<sup>12</sup>, Wnt signaling has emerged as the most important *in vivo* niche  
65 signaling component for the maintenance of adult stem cells *in vitro*<sup>13,14</sup>. Using this  
66 technology, 3D *in vitro* tissue structures that mimic the structural and functional  
67 properties of *in vivo* organs can be maintained, passaged, scaled-up, and even stored.  
68 Wnt3a was the first member of the Wnts added to culture media to support the long-term  
69 *in vitro* proliferation and self-renewal of adult stem cells in organoids<sup>13,15,16</sup>. Typically, this  
70 Wnt3a is obtained from the CM produced by a Wnt3a-expressing cell line in the presence  
71 of FBS<sup>13</sup>. But unknown components in FBS can have undesirable effects on stem cells,  
72 reducing the consistency and performance of this type of Wnt3a formulation<sup>17</sup>. To  
73 overcome this limitation, several groups have tried to identify the most critical  
74 component(s) in sera that solubilize Wnt and maintain its activity<sup>18,19</sup>. Recently, the  
75 Takagi group discovered that afamin (AFM), a member of the albumin superfamily of  
76 binding proteins, is a serum component that binds and solubilizes Wnts<sup>19</sup>. By co-  
77 expressing Wnt and AFM in the same cell line, soluble but active Wnts can easily be  
78 prepared in the absence of animal sera in the form of CM (Wnt3a-AFM CM). Moreover,  
79 Wnt3a-AFM CM supports the growth and expansion of human intestinal organoids for  
80 more than 18 passages<sup>19</sup>. The structure of AFM has been identified by both glycan and  
81 pocket analysis<sup>20</sup>. AFM forms a stable complex with Wnt3a that could improve its  
82 solubility by accepting the hydrophobic palmitoleic tail of a Wnt serine residue into a

83 hydrophobic binding pocket on its own surface<sup>20</sup>.

84

85 In this study, we found that AFM does not effectively solubilize Wnt3a alone. We have  
86 identified serum albumin (SA) as an essential co-factor necessary for Wnt3a  
87 solubilization in the production of FBS-free Wnt3a-AFM CM. We also found SA can  
88 effectively solubilize and stabilize purified Wnt3a *in vitro* in the absence of AFM. The  
89 effective concentration of SA in these two conditions (CM or purified Wnt3a) is far below  
90 the normal level present in human plasma or interstitial fluid<sup>21</sup>. In adult stem cell-derived  
91 human organoid cultures, both the Wnt3a-AFM CM produced in the presence of SA and  
92 the purified active Wnt3a maintained with SA can effectively promote organoid formation.  
93 Thus, in this study, we found SA can potently solubilize and stabilize Wnts, making it a  
94 simple, cost-effective, and efficient method for producing active Wnt preparations that  
95 are more compatible with both *in vitro* and *in vivo* use cases.

96 **Results**

97 **SA is required for the Wnt ligand activity of CM produced by L-Wnt3a-AFM cells**

98 When the albumin family protein AFM was found to solubilize Wnt3a and maintain its  
99 activity in solution<sup>19</sup>, we sought to better uncover the mechanism by which this occurs  
100 and determine whether it is influenced by other CM components. To confirm the  
101 conclusions reached by Mihara et al.<sup>19</sup> regarding the role of AFM, we performed a  
102 TOPflash assay (Wnt/ $\beta$ -catenin pathway reporter assay) using CM from cells expressing  
103 Wnt3a alone (L-Wnt3a cells) or cells co-expressing Wnt3a and AFM (L-Wnt3a-AFM cells)  
104 (Figure 1A). Not only did we find significant differences in the amount of Wnt3a in each  
105 CM, but the Wnt ligand activities of each CM depended on the presence of AFM (Figure  
106 1B). Thus, we confirmed the reported role of AFM in this Wnt3a CM preparation.

107

108 Next, we asked whether other components in the CM are required for AFM to produce its  
109 effect. We first tested the effect of SA, another member of the albumin superfamily of  
110 binding proteins and the most abundant plasma protein, on the Wnt ligand activity of  
111 Wnt3a-AFM CM. After adding varying amounts of bovine serum albumin (BSA) to Wnt3a-  
112 AFM CM, we measured the resulting TOPflash activity. We found that increases in BSA  
113 lead to a proportional rise in Wnt/ $\beta$ -catenin activity, implying that BSA further enhances  
114 Wnt3a activity (Figure 1C). We then compared the activity of Wnt3a-AFM CM in two  
115 different media: advanced DMEM (AdDMEM)/F12, which contains 0.4 mg/mL BSA and  
116 DMEM/F12, which is BSA-deficient (see Figure 1 – Figure supplement 1). As expected,  
117 Wnt ligand activity was significantly lower in DMEM/F12 (Figure 1D). Next, we further  
118 confirmed the requirement of BSA by showing that the addition of BSA to DMEM/F12-

119 based CM restores its Wnt ligand activity (Figure 1D). This indicates BSA is a potent  
120 enhancer of Wnt3a activity in conjunction with AFM. This effect of BSA is unrelated to its  
121 potential actions on cell viability or proliferation of L-Wnt3a-AFM cells (see Figure 1-  
122 Figure supplement 2). To determine whether this effect of SA is ubiquitous across species,  
123 we performed the same test with recombinant human serum albumin (rHSA) derived  
124 from rice. We found that, like BSA, rHSA produced an enhancement of Wnt ligand activity  
125 (Figure 1D). This result also indicates that the effect of BSA in the TOPflash assay is not  
126 due to its contaminating proteins or lipids. We next investigated the specificity of the role  
127 of SA in this phenomenon, asking whether other abundant blood-based proteins, such as  
128 Immunoglobulin-G (IgG), could give the similar result. After performing a TOPflash assay  
129 comparing Wnt3a activity between BSA+ and IgG+ CM, we found that IgG had no effect on  
130 Wnt3a activity (Figure 1E). Thus, the phenomenon is specific to BSA.

131

132 We next asked whether BSA exerts its effect by increasing the amount of secreted AFM in  
133 the CM. We found relatively consistent levels of AFM in the CMs and cell lysates regardless  
134 of their BSA status (Figure 1F). This means that BSA has no effect on the amount of AFM  
135 synthesized or secreted and that more AFM cannot substitute for the presence of BSA.  
136 This was further confirmed when we increased the concentration (up to 40  $\mu\text{g}/\text{mL}$ ) of  
137 exogenous AFM in the absence of BSA and found that it had little effect on Wnt3a activity  
138 compared to 1  $\mu\text{g}/\text{mL}$  AFM in the presence of AddMEM/F12 (Figure 1G). Together, these  
139 data demonstrate that while AFM in the media is certainly required for Wnt3a activity in  
140 CM, so is the presence of BSA.

141 **SA specifically requires AFM to support the Wnt ligand activity of Wnt3a-AFM CM**

142 After establishing that BSA is necessary for supporting Wnt3a activity in CM, we asked  
143 whether higher concentration BSA (5 mg/mL) can maintain Wnt3a activity in Wnt3a CM  
144 even in the absence of AFM. To this end, we compared two cell types: L-Wnt3a-AFM cells,  
145 which co-secrete Wnt3a and AFM, and L-Wnt3a cells, which secrete Wnt3a alone. When  
146 we added exogenous BSA (5 mg/mL) to the DMEM/F12 media in which each cell line was  
147 cultured to produce CM, only the resulting Wnt3a-AFM CM showed a dramatic increase in  
148 TOPflash activity (Figure 2A). This clear evidence that AFM is essential for BSA to  
149 maintain Wnt3a activity in CM led us to further ask whether this capacity is specific to  
150 AFM or whether another member of the albumin superfamily of binding proteins, such as  
151 vitamin D binding protein (VDBP) or  $\alpha$ -fetoprotein (AFP), could take its place. When we  
152 compared the TOPflash activities of CMs produced after adding each candidate protein  
153 exogenously along with BSA to the cultured L-Wnt3a cells, we found that neither VBDP  
154 nor AFP combined with BSA improved Wnt3a activity when compared to BSA alone or  
155 BSA combined with exogenous AFM (Figure 2B). These data suggest AFM is the only other  
156 member of the albumin superfamily of binding proteins that is effective for supporting  
157 Wnt3a activity in combination with BSA in CM.

158

159 **SA prevents aggregation of Wnt3a protein in Wnt3a-AFM CM**

160 Next, we investigated the mechanisms by which SA increases Wnt3a activity in Wnt3a-  
161 AFM CM. First, we did not observe any difference in the Wnt3a protein levels of cell lysates  
162 from L-Wnt3a-AFM cells cultured in BSA+ or BSA- media (Figure 3A). From these data,  
163 we inferred that BSA does not affect the Wnt3a secretory pool. Next, we asked whether



164 BSA affects the secretion of Wnt3a by adding the protein synthesis inhibitor  
165 cycloheximide (CHX) to the media of L-Wnt3a-AFM cells and measuring cellular changes  
166 in Wnt3a protein levels for up to 24 hrs in the absence or presence of BSA. BSA did not  
167 affect the rate of Wnt3a loss in cell lysates (Figure 3B). Rather than changes in Wnt3a  
168 production, the reduction in intracellular Wnt3a seems to be due to a change in protein  
169 secretion. This is because addition of the Wnt secretion inhibitor IWP-2 produced a near  
170 full recovery (Figure 3B). These findings suggest BSA does not affect the typical route by  
171 which Wnt3a is secreted. Wnt is normally, at least in part, secreted in exosomes<sup>22</sup>. We  
172 found, however, that BSA did not alter the amount of Wnt3a in exosomes derived from  
173 Wnt3a-AFM cells (see Figure 3 – Figure supplement 1).

174

175 We next asked how BSA affects the way Wnt3a's activity changes after it is released into  
176 the CM. Wnt rapidly loses its activity upon its addition to serum- or detergent-free  
177 solutions<sup>10,18</sup>. Thus, we looked for any changes in the relative Wnt3a protein level or the  
178 TOPflash activity of purified Wnt3a in DMEM/F12 maintained in tubes over 48 hrs at 37°C.  
179 Interestingly, although we found TOPflash activity fell rapidly in the absence of BSA, the  
180 levels of purified Wnt3a protein did not change over the course of 48 hrs (Figure 3C).  
181 Based on this, we hypothesized that BSA supports the long-term maintenance of Wnt3a  
182 activity by preventing protein aggregation. To investigate the hypothesis that BSA  
183 increases Wnt3a solubility or conformational stability, we performed a protein complex  
184 size fractionation, dividing CM with or without BSA into 13 fractions. In the presence of  
185 BSA, Wnt3a remained in a monomeric or oligomeric form, with bands present only in the  
186 low-density fractions (Figure 3D). In the absence of BSA, however, the Wnt3a bands  
187 appeared only in the high-density fractions, indicating the presence of aggregated,

188 inactive Wnt3a. Using TOPflash assays to measure the activity of each fraction, we found  
189 the highest Wnt3a activity in the low-density fractions of BSA+ CM containing soluble  
190 Wnt3a (Figure 3D). These findings suggest BSA solubilizes and stabilizes active Wnt3a in  
191 Wnt3a-AFM CM by preventing its aggregation. AFM is known to form a complex with  
192 Wnt3a<sup>19</sup>. To determine whether BSA also binds Wnt3a to prevent its aggregation, we used  
193 Wnt3a antibodies to perform an immunoprecipitation of Wnt3a-AFM CM supplemented  
194 with BSA (5 mg/mL). We found that while AFM interacts with Wnt3a, BSA does not  
195 (Figure 3E). These data suggest a direct interaction between BSA and Wnt3a is not  
196 required for BSA to maintain Wnt3a in its active form.

197

### 198 **Wnt3a-AFM CM needs BSA to support the growth and expansion of human adult** 199 **stem cell organoids**

200 We compared the effects of Wnt3a-AFM (+BSA) CM, Wnt3a-AFM (-BSA) CM, and Wnt3a-  
201 FBS CM on the growth and passaging of human colon and stomach organoids. For both  
202 types of organoids, we found that only Wnt3a-AFM (+BSA) CM, not Wnt3a-AFM (-BSA)  
203 CM supported a growth rate comparable to that of Wnt3a-FBS CM (Figure 4A and 4D).  
204 Organoids cultured in Wnt3a-AFM (-BSA) CM, which is deficient in BSA, showed a cell  
205 growth plateau after the first passage (Figure 4A and 4D). In an immunohistochemistry  
206 experiment using the proliferation marker Ki67, we found more proliferating cells in  
207 organoids grown in Wnt3a-AFM (+BSA) CM than in those grown in the BSA-deficient CM  
208 (Figure 4B and 4E). In a real-time RT-PCR experiment, we also found significantly higher  
209 expression of the Wnt target genes *LGR5* and *AXIN2* in both types of organoids in the  
210 presence of both BSA and AFM (Figure 4C and 4F). Together, these data indicate BSA is

211 essential for the CM made from L-Wnt3a-AFM cells to support the growth and expansion  
212 of adult stem cell organoids. The role of BSA in these preparations seems to maintain  
213 Wnt3a in its active form.

214

### 215 **SA can solubilize and stabilize purified Wnt3a in the absence of AFM**

216 To directly demonstrate that interactions between Wnt3a, AFM, and BSA are sufficient for  
217 the solubilization and stabilization of active Wnt3a, we performed an *in vitro* solubility  
218 assay. First, we spun down various combinations of purified Wnt3a with AFM or BSA in  
219 solution (incubated for 4 hrs before centrifugation) in a centrifuge to produce a pellet and  
220 a supernatant (Figure 5A). We then observed on western blots that Wnt3a was primarily  
221 soluble and in the supernatant in the presence of BSA, while it mainly appeared in an  
222 insoluble form in the pellet in the absence of BSA (Figure 5B). rHSA also showed a similar  
223 effect (see Figure 5 – Figure supplement 1). The addition of AFM did not do much to  
224 maintain more of the purified Wnt3a in its soluble form than BSA alone (Figure 5B).  
225 Moreover, a fractionation experiment with purified Wnt3a solution demonstrated the  
226 occurrence of aggregation even in the presence of AFM (Figure 5C, left panel). It was only  
227 in the presence of BSA that Wnt3a was present in its soluble monomeric or oligomeric  
228 states (Figure 5C, left panel). We also confirmed the Wnt ligand activity of the soluble  
229 Wnt3a via a TOPflash assay of each fraction (Figure 5C, right panel).

230

231 The purified Wnt3a preparation we used in *in vitro* solubility assays contained trace  
232 amounts of CHAPS because we used CHAPS-purified Wnt3a proteins (R&D systems).  
233 Wnt3a would become insoluble as the CHAPS was diluted to a concentration at which

234 CHAPS alone could not efficiently prevent Wnt3a aggregation (see Figure 5 – Figure  
235 supplement 2). It is notable that, even in trace amounts of CHAPS (0.001 %), BSA was able  
236 to maintain Wnt3a in a soluble form without the addition of AFM (see Figure 5 – Figure  
237 supplement 2). To further determine whether BSA contributes to the process of  
238 solubilizing Wnt3a, we added BSA after Wnt3a aggregation had already occurred.  
239 Compared to 1% CHAPS which efficiently solubilized Wnt3a<sup>4</sup>, we found on western blot  
240 that a lower concentration of CHAPS (0.001 %) allowed for significant Wnt3a aggregation  
241 (Figure 5D). The addition of BSA (5 mg/ml, 4 hrs after Wnt3a aggregation in 0.001 %  
242 CHAPS), however, restored Wnt3a solubility even at a lower CHAPS concentration (Figure  
243 5D). This suggests BSA itself can solubilize Wnt3a. We also asked whether BSA affects the  
244 thermostability of Wnt3a because a previous study found that purified Wnt3a with  
245 CHAPS was unstable at 37°C<sup>23</sup>. We found purified Wnt3a was nearly equally soluble at  
246 both 4°C and 37°C in the presence of BSA, indicating that the effect of BSA on Wnt3a  
247 activity is unrelated to thermostability (Figure 5E).

248

249 Finally, we examined the effects of BSA on other members of the Wnt protein family,  
250 seeking to determine the prevalence of its role in protein solubilization. On western blot,  
251 we observed a clear shift of mouse Wnt3a, human Wnt3, and human Wnt5a into the  
252 supernatant in the presence of BSA (Figure 5F). This suggests multiple members of the  
253 Wnt protein family may similarly interact with BSA, presenting opportunities for  
254 expanding the methods outlined in this study to other Wnt family proteins. Ultimately,  
255 our data indicate BSA effectively maintains purified Wnt3a in its soluble and active form  
256 without the help of AFM.

257

## 258 **A new method for preparing purified, active Wnt3a in the absence of CHAPS**

259 Based on the results above, we have developed a new method for maintaining purified  
260 Wnt3a in its active form after removing CHAPS. This new method can be used in both *in*  
261 *vitro* organoid culture applications and in the development of safe therapeutic agents.  
262 Typically, purified Wnt3a protein preparations contain some CHAPS (0.5–1%), which  
263 maintains Wnt3a in an active form. When the CHAPS is diluted, however, Wnt3a loses its  
264 solubility and activity (Figure 6A). Because we found that BSA can solubilize and stabilize  
265 purified Wnt3a, we planned to dialyze CHAPS from the active Wnt3a solution containing  
266 both Wnt3a and BSA (Figure 6B). A purified Wnt3a-BSA solution (pWnt3a-BSA) that  
267 remains soluble and active even after the removal of CHAPS would be an ideal Wnt3a  
268 preparation. To this end, we placed purified Wnt3a proteins containing CHAPS in a 10 kDa  
269 dialysis cassette along with BSA (5 mg/mL) and performed dialysis against standard  
270 DMEM/F12 media. Since both Wnt3a and BSA have molecular weights larger than 10 kDa  
271 (37.5 kDa and 66.5 kDa, respectively), they remain within the dialysis cup while the 0.6  
272 kDa CHAPS diffuses out into the surrounding media. In contrast to the surface of the low  
273 protein binding tubes (LoBind) we used in other experiments of this study, the dialysis  
274 membranes adsorbed much of the Wnt3a in the absence of BSA (Figure 6C). Fortunately,  
275 the addition of BSA recovered much of this lost Wnt3a. BSA is known to prevent  
276 nonspecific protein adsorption to polymer surfaces. Moreover, when we performed a  
277 western blot following dialysis, we saw a clear distinction in the partitioning of Wnt3a  
278 into the supernatant only in the presence of BSA (Figure 6D). These findings indicate that  
279 BSA both maintains protein solubility and prevents the adsorption of Wnt3a to the  
280 membrane. These effects seem to be specific to BSA because the same concentration of

281 IgG (5 mg/mL) failed to prevent the adsorption and aggregation of Wnt3a (Figure 6C, D).  
282 We also observed that BSA can maintain Wnt3a in its soluble form over time with little  
283 change in the amount present in the soluble fraction (Figure 6E, F). To confirm the long-  
284 term durability of Wnt3a activity in this preparation, we measured the TOPflash activities  
285 of Wnt3a in BSA- and BSA+ solutions stored at 4°C for the indicated number of weeks. We  
286 found that purified Wnt3a solubilized and stabilized by BSA remained active for at least  
287 2 wks when stored at 4°C (Figure 6G). We also found that pWnt3a-BSA solution  
288 maintained its activity after a freeze-thaw cycle, suggesting mid- to large-scale production  
289 of BSA-stabilized Wnt3a and its storage in freezers is feasible (Figure 6H). We also tested  
290 the functional validity of the pWnt3a-BSA solution by examining the cooperative  
291 interaction between purified Wnt3a and R-spondin. Indeed, we found co-administration  
292 of R-spondin and pWnt3a-BSA markedly potentiated canonical Wnt/ $\beta$ -catenin signaling  
293 (Figure 6I). This suggests pWnt3a-BSA is compatible with R-spondin, which is critical for  
294 the amplification of Wnt signaling<sup>24</sup>. Last, we found pWnt3a-BSA is at least equal to or  
295 more efficient than Wnt3a-FBS CM in supporting the growth, expansion, and  
296 development of human colon organoids (Figure 6J and 6K). We also confirmed that rHSA  
297 similarly supports the growth and expansion of these organoids (see Figure 6 – Figure  
298 supplement 1). Together, we present for the first time, a new method for producing  
299 purified Wnt3a that remains active in solution, using BSA or even HSA instead of CHAPS  
300 as a solubilizing agent.

301 **Discussion**

302 Mihara et al. (2016) found AFM binds Wnt3a in a 1:1 ratio in the CM from Expi293F cells  
303 co-expressing AFM and Wnt3a, maintaining Wnt3a in a soluble state in CM. In this study,  
304 our recognition of a difference between the ability of basal media such as DMEM/F12 and  
305 AddMEM/F12 to solubilize the Wnt3a-AFM complex led us to identify SA as an additional  
306 important factor in serum that can improve the yield and performance of active Wnt3a  
307 CM preparations. This does not mean AFM is not essential in making serum-free Wnt3a  
308 CM. Rather, we found that although SA alone has minimal effects on solubilization or  
309 stabilization of Wnt3a in Wnt3a CM production, we saw a large increase in Wnt3a activity  
310 with the addition of both BSA and AFM. From their data, we inferred that Mihara et al.<sup>19</sup>  
311 likely used AddMEM/F12 factory-formulated to contain 0.4 mg/mL of BSA. They showed  
312 on a protein gel stained with Oriole fluorescent stain that purified Wnt3a-AFM from the  
313 eluted Wnt3a-AFM CM fractions was contaminated by BSA. We think this covertly  
314 contributed to their identification of AFM as the serum factor that solubilizes and protects  
315 Wnt3a. After comparing the activity of all the members of the albumin superfamily  
316 proteins, including SA, AFM,  $\alpha$ -fetoprotein, and vitamin D binding protein, Mihara et al.<sup>19</sup>  
317 concluded that SA is not involved in maintaining active Wnt3a. This finding is consistent  
318 with our data showing that BSA alone cannot efficiently solubilize Wnt3a in the process  
319 of CM production. Because SA indeed requires AFM to maintain active Wnt3a secreted  
320 from cells, it is highly possible AFM has a distinct role from BSA. Naschberger et al.<sup>20</sup>  
321 revealed how afamin forms a stable complex with Wnt proteins and Mihara et al.<sup>19</sup>  
322 showed that Wnt3a is nearly absent in CM when AFM is removed. However, AFM does not  
323 effectively stabilize purified Wnt3a in tubes<sup>10</sup>. Considering these results, the role of AFM  
324 may require complex formation between AFM and Wnt3a during the process of its

325 synthesis, transport, or secretion. In contrast, according to our results and consistent with  
326 a previous report<sup>19</sup>, SA does not affect Wnt3a secretion. Further studies on possible  
327 mechanisms by which AFM functions in the Wnt secretory pathway may clarify the well-  
328 known Porcupine and Wntless-mediated Wnt secretion pathway.

329

330 A previous study using Wnt-responsive luciferase reporter cells found that heparan  
331 sulfate proteoglycan (HSPG) rather than BSA stabilized purified Wnt3a protein activity<sup>18</sup>.  
332 This result is inconsistent with our current data showing that BSA can solubilize and  
333 stabilize purified Wnt3a. We found that pWnt3a-BSA efficiently increases Wnt/ $\beta$ -catenin  
334 pathway reporter expression and promotes the growth of adult stem cell organoids. The  
335 discrepancy appears to come from the concentrations of BSA tested in each study. We  
336 used 0.4 mg/mL or 5 mg/mL BSA, whereas the previous study only tested concentrations  
337 up to 30  $\mu$ g/mL. Considering the typical concentrations of BSA in the blood (30–50  
338 mg/mL) and interstitial fluids (around 30% of that in the plasma), the concentrations of  
339 BSA we used are more physiologically relevant and are unlikely to cause any cytotoxicity.

340

341 The structural modeling of the albumin-Wnt3a complex has not yet been successful. This  
342 is because the albumin binding pocket, although deep and branched, is narrower and its  
343 entrance region presents charged and polar residues<sup>20</sup>. This discourages the entry of  
344 hydrophobic palmitoleic O-acylation moieties, resulting in a much-reduced probability of  
345 direct interaction between SA and Wnt3a. Our immunoprecipitation results also indicates  
346 that SA does not participate in any protein-protein interactions with Wnt3a the way AFM  
347 dose. Instead, SA may work indirectly by protecting afamin from taking forms with lower



348 Wnt3a binding affinities. This is unlikely, however, because purified Wnt3a can be  
349 solubilized and stabilized by SA alone, even in the absence of AFM. It is also unlikely that  
350 BSA binds AFM directly because there is a clear separation of SA from the Wnt3a-AFM  
351 complex when they are run through a size exclusion chromatography column<sup>19</sup>. On the  
352 molecular level, albumin does not have a strong chaperone-like activity<sup>25</sup>. It is possible  
353 that Wnt3a stabilization occurs via weak nonspecific interactions with albumin that  
354 become physiologically relevant at higher albumin concentrations. Further studies will  
355 be necessary to clarify the exact mechanism by which SA solubilizes Wnt3a and whether  
356 its function applies only to the Wnts.

357

358 Wnt preparations hold promise as additives to the media used for stem cell cultures,  
359 especially adult stem cell-derived human organoid cultures<sup>15</sup>. Such organoids have  
360 enormous diagnostic and therapeutic potential in precision medicine<sup>11</sup>. Our identification  
361 of the most abundant serum protein (35–50 mg/mL)<sup>21</sup> as a critical factor that supports  
362 the prolonged maintenance of active Wnts is encouraging because it provides a  
363 solubilization and stabilization strategy that is both physiological and robust. SA has a  
364 long half-life of 21 days<sup>26</sup>, suggesting that it will prove to be a durable Wnt stabilizer.  
365 Recombinant human SA produced in rice gives an equivalent, or even superior,  
366 performance in stabilizing the Wnt3a-AFM complex. This will make it even easier to  
367 produce safe Wnt3a at the high yields. We expect the use of purified Wnt3a preparations  
368 to be far preferable to CM in organoid cultures. pWnt3a-BSA has less animal cell-derived  
369 contamination, which is beneficial when culturing cells as sensitive as stem cells. It is also  
370 now possible to add measurable amounts of Wnt3a into cultures with minimal variability,  
371 permitting more precise comparisons of stem cell and organoid culture results from

372 different laboratories. We have not yet tested the long-term effects of pWnt3a-BSA on  
373 organoid cultures, but it seems likely that even more advantages can be found, such as the  
374 maintenance of stemness and improvements to differentiation or maturation potential.

375

376 SA is cheaper and seems to act via a more “physiological” mechanism than other currently  
377 known Wnt stabilizers, such as heparan sulfate proteoglycan (HSPG), secreted Frizzled-  
378 related protein (sFRP), and liposomes<sup>10,18,27</sup>. Although HSPG is also a physiological  
379 component of FBS, it is too expensive for producing HSPG-stabilized Wnt3a preparations  
380 of practical use. sFRP both promotes and suppresses Wnt/ $\beta$ -catenin signaling, depending  
381 on the context<sup>28</sup>. Liposomes mixed with purified Wnt3a are an effective stabilizer of  
382 Wnt3a<sup>10</sup>, but they are costly to produce and it is technically demanding to prepare  
383 liposomal Wnt in standard biology labs. Moreover, liposomes sometimes undergo leakage  
384 of their encapsulated molecules and suffer from phospholipid oxidation, limiting their  
385 effectiveness. Wnt3a preparations stabilized with SA overcome all the drawbacks of these  
386 other Wnt stabilizers. And perhaps most important, the SA-based preparation of Wnt3a  
387 we propose here is simpler to make and more physiological, seemingly mimicking how  
388 human organs stabilize their extracellular Wnts.

389

390 In this study, we identified SA as an essential and physiological factor that maintain Wnt3a  
391 in its soluble and active form. The use of SA in preparing Wnt3a-containing CM or purified  
392 Wnt3a will greatly contribute to higher-yield production and purification of active Wnt3a  
393 and other Wnts. This will pave the way for the optimization of Wnt preparations for  
394 various therapeutic uses and as a culture additive in producing high-quality adult stem

395 cell-derived human organoids.

## 396 **Experimental procedures**

### 397 **Reagents and consumables**

398 Bovine serum albumin (BSA), recombinant human albumin (rhALB), and  
399 immunoglobulin G (IgG) were purchased from Sigma-Aldrich (St. Louis, MO, USA).  
400 Protein LoBind tubes were purchased from Eppendorf (Hamburg, Germany). Human  
401 Wnt3a, Mouse Wnt3a and human Wnt5a proteins were purchased from R&D systems  
402 (Minneapolis, MN, USA). Human Wnt3 and afamin protein were purchased from Origene  
403 (Rockville, MD, USA) and R&D systems, respectively.

404

### 405 **Cell culture**

406 HEK293 STF (ATCC, CRL-3249), Wnt3a-producing L cells (L-Wnt3a cells), and L-Wnt3a  
407 cells transduced with pLVX-EF1 $\alpha$ -human afamin-IRES-blasticidin-S deaminase (BSD) (L-  
408 Wnt3a-AFM cells) were grown in Dulbecco's Modified Eagle's medium (DMEM, Hyclone)  
409 supplemented with 100 IU/mL penicillin, 100  $\mu$ g/mL streptomycin, and 10% fetal bovine  
410 serum (FBS, Hyclone). Cells were maintained in a 5% CO<sub>2</sub>/95% air incubator with a  
411 humidified environment at 37°C. The L-Wnt3a cells were a kind gift from Hans Clevers.

412

### 413 **Plasmid construction**

414 To generate the lentiviral human AFM expression plasmid, pLVX-EF1 $\alpha$ -IRES-BSD was first  
415 generated by modifying pLVX-EF1 $\alpha$ -IRES-Puro (Clontech). Then, the human AFM CDS was  
416 amplified by PCR from pCR-BluntII-TOPO-AFM (MHS6278-211689548; Dharmacon,  
417 Lafayette, CO, USA) with the primers listed in Table 1. The product was digested with XbaI

418 and inserted into the XbaI site of pLVX-EF1 $\alpha$ -IRES-BSD. Primer used for constructing the  
419 AFM expression plasmid is as described below.

420

| Name       | Sequences                                    |
|------------|----------------------------------------------|
| hAfamin U1 | TATAATCTAGAGCCACCATGGTGAAACTACTAAAACCTTACAGG |
| hAfamin L1 | TATATTCTAGATTCAGTTGCCAATTTTTGGAC             |

421

### 422 **Generation of L-Wnt3a-AFM cells by lentiviral transduction**

423 HEK293T cells (human embryonic kidney cells) were seeded on 6-well plates pre-coated  
424 with poly-L-lysine (PLL) at a density of 600,000 cells/well and incubated for 24 hrs. The  
425 cells were transfected with 3  $\mu$ g of a 4:3:1 mixture of lentiviral human AFM expression  
426 plasmid, packaging plasmid (psPAX2, Addgene 12260), and envelope expression plasmid  
427 (pMD2.G, Addgene 12259) in the presence of polyethyleneimine. The cells were refreshed  
428 with 3 mL of growth medium 16 hrs after transfection and further incubated for 36 hrs.  
429 Then, the media containing the lentiviruses were harvested and centrifuged at 3,000 rpm  
430 for 3 min to eliminate cell debris. The supernatants were collected and stored at  $-80^{\circ}\text{C}$   
431 until use.

432 One day before transduction, L-Wnt3a cells were plated on 24-well plates at a density of  
433 50,000 cells/well and grown for 24 hrs. The culture medium was replaced with 400  $\mu$ L of  
434 a 1:1 mixture of the lentivirus-containing medium and fresh culture medium  
435 supplemented with polybrene at a final concentration of 4  $\mu$ g/mL. After 15 hrs, the cells  
436 were refreshed with 500  $\mu$ L of culture medium and incubated for an additional 72 hrs. L-  
437 Wnt3a-AFM cells were generated by selection with 2  $\mu$ g/mL puromycin until a parallel

438 culture of L-Wnt3a cells died.

439

#### 440 **Production of Wnt CM**

441 L-Wnt3a-AFM or L-Wnt3a cells were plated at a density of 150,000 cells per 24-well plate  
442 or 4,500,000 cells per 100-mm plate and incubated for 48 hrs. Then, the cells were  
443 washed twice with phosphate-buffered saline (PBS), refreshed with the indicated  
444 medium (500  $\mu$ L for the 24-well plates; 12 mL for the 100-mm plates), and incubated for  
445 5 days. The CM was harvested and centrifuged at 1,000 rpm for 2 min. The supernatants  
446 were cleared through a 0.45  $\mu$ m syringe filter and stored at 4 °C.

447

#### 448 **Luciferase reporter assay to measure Wnt activity**

449 HEK293 STF cells were seeded on PLL-coated 96-well opaque plates at a density of  
450 25,000 cells/well and grown for 24 hrs. Then, each well was treated with 100  $\mu$ L of fresh  
451 culture medium combined with 50  $\mu$ L of CM to assay for 24 hrs. After aspiration, 100  $\mu$ L  
452 of the 1x steady-Glo reagent (Steady-Glo® Luciferase Assay System, E2520; Promega,  
453 Madison, WI, USA) was added to each well. The luminescence of each well was measured  
454 using an Infinite 200 PRO plate reader (Tecan).

455

#### 456 **MTT assay for assessing cell viability**

457 The growth medium was removed from the cells and 1 mg/mL 3-(4,5-Dimethylthiazol-2-  
458 yl)-2,5-diphenyltetrazolium bromide (MTT) dissolved in growth medium was added to  
459 each well of interest. The cells with the MTT solution were incubated in 5% CO<sub>2</sub>/95% air

460 at 37°C for 2 hrs. Then, after aspirating the MTT solution, solvent solutions (10% sodium  
461 dodecyl sulphate and 25% dimethyl formamide, pH 4.7) were added to each well and  
462 incubated overnight. The solutions were then transferred to a 96-well plate and the  
463 absorbance at 590 nm was measured.

464

## 465 **Immunoblot**

466 CM samples were harvested and centrifuged at 1,000 rpm for 2 min. Then, the  
467 supernatants were mixed with 5× Laemmli sample buffer and boiled for 10 min. For cell  
468 lysate samples, the cells were placed on ice and washed twice with cold PBS containing  
469 100 mg/L CaCl<sub>2</sub> and 100 mg/L MgCl<sub>2</sub>. The cells were lysed with cold RIPA lysis buffer  
470 containing 10 mM Tris-Cl (pH 8.0), 1% Triton X-100, 140 mM NaCl, 1 mM  
471 ethylenediaminetetraacetic acid (EDTA), 0.1% sodium dodecyl sulfate, and 1× cOmplete  
472 Protease Inhibitor Cocktail (Roche, Basel, Switzerland). The lysates were clarified by  
473 centrifugation at 13,000 rpm at 4 °C for 10 min. The protein concentration was measured  
474 using a bicinchoninic acid (BCA) assay. Samples with identical concentrations were added  
475 to 5× Laemmli sample buffer and boiled for 10 min. For purified Wnt proteins, samples  
476 were mixed with 5x Laemmli sample buffer and boiled for 10 min. The denatured samples  
477 in Laemmli buffer were separated by 12% sodium dodecyl sulfate polyacrylamide gel  
478 electrophoresis (SDS-PAGE) and transferred onto nitrocellulose membranes (Whatman,  
479 Dassel, Germany). The membranes were blocked with 5% skim milk in PBS containing  
480 0.05% Tween 20 (PBST). Primary antibodies (anti-mouse Wnt3a [2391; Cell Signaling  
481 Technology, Danvers, MA, USA], anti-human AFM [sc-373849; Santa Cruz Biotechnology,  
482 Santa Cruz, CA, USA], anti-human albumin [ab207327; Abcam, Cambridge, UK] and anti-

483  $\beta$ -actin Ab [sc-1651; Santa Cruz Biotechnology]) were used at a 1:1,000 dilution in  
484 blocking solution. Secondary antibody conjugated to horseradish peroxidase was used at  
485 a 1:5,000 dilution in skim milk. Immunoblot images generated with enhanced  
486 chemiluminescence (ECL) solution (Thermo Fisher Scientific) were captured using a  
487 Fusion Solo 4M (Vilber Lourmat, Eberhardzell, Germany) camera. The band intensities  
488 were analyzed using ImageJ software.

489

### 490 **Evaluation of Wnt stability**

491 The indicated Wnt3a CM (Wnt3a-AFM CM with or without BSA, Wnt3a-FBS CM) or  
492 purified Wnt3a was added to Protein LoBind tubes and further incubated for 6, 12, 24, or  
493 48 hrs in 5% CO<sub>2</sub>/95% air at 37°C. Immunoblotting with anti-Wnt3a antibodies and  
494 TOPflash assays were conducted to assess Wnt3a protein levels and Wnt3a ligand  
495 activities at the indicated time of incubation.

496

### 497 **Sucrose density gradient centrifugation**

498 Sucrose density gradient centrifugation was conducted as previously described, with  
499 minor modifications. One milliliter each of 20%, 15%, 10%, and 5% sucrose solutions was  
500 layered in a 5 mL polyallomer tube (326819, Beckman Coulter) from bottom to top. Then,  
501 1 mL of the indicated Wnt preparation (Wnt3a CM or purified Wnt3a) was loaded on the  
502 top of the sucrose gradient. The tubes with their samples were centrifuged at 150,000 x  
503 g at 4°C for 5 hrs. The centrifugation was performed with an Optima MAX-XP  
504 ultracentrifuge using an MLS 50 rotor (Beckman Coulter). Then, 400- $\mu$ L fractions were



505 collected from top to bottom and stored at 4°C. Each fraction was analyzed for Wnt  
506 activity via TOPflash assays and for Wnt protein amount via immunoblotting using anti-  
507 Wnt3a antibodies.

508

### 509 **Solubility assays on purified Wnt**

510 Solubility assays were conducted as previously described<sup>29</sup>, with minor modifications.  
511 Wnt proteins (500 ng/mL) were incubated in serum-free media containing vehicle, AFM,  
512 or BSA at 37°C. After incubation for the indicated time, the solutions were centrifuged at  
513 27,000 g for 1 hr at 4°C. The supernatants were collected and mixed with 5× Laemmli  
514 sample buffer, and the pellets were dissolved with 1× Laemmli sample buffer. The samples  
515 were then subjected to immunoblotting, and the amount of Wnt protein in each fraction  
516 was detected using Wnt subtype-specific antibodies.

517

### 518 **Exosome purification**

519 Exosomes were purified by differential centrifugation as previously described<sup>22</sup>. Briefly,  
520 Wnt3a CMs harvested from L cells or L-Wnt3a-AFM cells with or without BSA were  
521 subjected to sequential centrifugation steps of 300 g, 2,000 g, and 10,000 g for 10 min, 10  
522 min, and 30 min, respectively, before pelleting the exosomes at 100,000 g in a SW41Ti  
523 swinging bucket rotor for 3 hrs (Beckman). Supernatants (S<sub>NΔ</sub>) were collected, mixed  
524 with 5x Laemmli sample buffer, and incubated at 37°C for 10 min. For the exosomes  
525 (P100), samples were mixed with 1x Laemmli sample buffer and incubated at 37°C for 10  
526 min. Then, the samples were analyzed by immunoblotting using anti-mouse Wnt3a, anti-

527 GPR177 (17950-1-AP; Proteintech, IL, USA), or anti-TSG101 (ab125011, Abcam)  
528 antibodies.

529

### 530 **Dialysis**

531 Purified Wnt3a (500 ng/mL) and 1% CHAPS were loaded into Slide-A-Lyzer Dialysis  
532 Device (10 kDa MWCO) with or without AFM or BSA. Dialysis against DMEM/F12 was  
533 performed for 48 hrs at 4 °C. During dialysis, the old dialysate (DMEM/F12) was  
534 discarded and replaced with fresh DMEM/F12 every 6 or 12 hrs. The samples were then  
535 transferred to new 1.5 mL LoBind tubes for further assays.

536

### 537 **Human organoids culture**

538 Human normal stomach and colon tissue samples were obtained from patients who  
539 underwent gastrectomies, colectomies or colonoscopies. All samples were collected after  
540 obtaining informed consent from the patients before their participation in the study. The  
541 use of donor materials for research purposes was approved by the Institutional Review  
542 Board (IRB) of Yonsei University Health System (4-2012-0859 and 4-2017-0106). The  
543 tissue samples were minced, washed with ice-cold DPBS, and then incubated with a gentle  
544 cell dissociation reagent (Stemcell technologies) at room temperature for 30 min to  
545 release gastric glands or colonic crypts. Isolated gastric glands were washed with ice-cold  
546 DPBS, suspended in 25 µL of Matrigel, and seeded into 48-well plates. After 15 minutes  
547 for solidification of the Matrigel at 37°C, human stomach organoid culture medium was  
548 added to each well. Human stomach organoid culture medium contains advanced

549 DMEM/F12 supplemented with 10 mM HEPES, 2 mM GlutaMax and 1x antibiotics-  
550 antimycotics (all from Gibco) with the following additional factors: 2% B-27 supplement  
551 (Gibco), 1 mM N-acetylcysteine (Sigma), 50 ng/ml EGF (Peprotech), 150 ng/ml noggin  
552 (Peprotech), 10% R-spondin1 CM (produced using HA-R-Spondin-1-Fc 293T cells,  
553 Trevigen), 200 ng/ml FGF10 (Peprotech), 10 nM gastrin-I (Sigma), 2  $\mu$ M A-8301 (Tocris),  
554 and 50% Wnt3a CM for stomach organoids; 2% B-27 supplement, 1 mM N-acetylcysteine,  
555 50 ng/ml EGF, 100 ng/ml noggin, 10% R-spondin1 CM, 10 nM gastrin-I, 500 nM A-8301,  
556 10  $\mu$ M SB202190 (Tocris), and 50% Wnt3a CM for colon organoids. The medium was  
557 replaced every 3 days, and the organoids were split every 7 days.

558

### 559 **Organoid growth assay**

560 To assess the growth of organoids treated with each Wnt3a CM preparation, the organoids  
561 were digested with TrypLE (Gibco) at 37°C for 5–10 minutes until they were dissociated  
562 into single cells. Cells were washed with DMEM supplemented with 1% fetal bovine  
563 serum and 1% penicillin-streptomycin (Gibco) and plated on 24-well plates at a density  
564 of 5,000 cells/well in 40  $\mu$ L of Matrigel. After 10 days of growth, the organoids were  
565 digested down to single cells using TrypLE and re-plated at the same density, while the  
566 cell numbers for each well were counted. The cumulative number of cells at each passage  
567 was calculated using the following equation: number of cells in the previous passage x the  
568 number of cells in the current passage / the number of cells plated in the current passage.

569

### 570 **Quantitative real-time RT-PCR**

571 RNA extraction from organoids was conducted using the RNeasy Mini Kit (Qiagen)  
572 followed by cDNA synthesis with Superscript IV (Invitrogen) according to the  
573 manufacturer's instructions. Then, cDNAs were amplified using SYBR Green Master mix  
574 (Applied Biosystems) on a StepOne Real-Time PCR system (Applied Biosystems).  $\beta$ -actin  
575 was used as an internal control and the expression level of each gene was normalized to  
576 the level of  $\beta$ -actin. The PCR primers used were as follows: 5'-  
577 AGGTCTGGTGTGTTGCTGAG-3' and 5'-GTGAAGACGCTGA GGTTGGA-3' for *LGR5* and 5'-  
578 GCTGCGCTTTGATAAGGTCC-3' and 5'-GCTCATCTGAACCTCCTCT CTTT-3' for *AXIN2*.

579

## 580 **Immunostaining**

581 Organoids were fixed with 4% paraformaldehyde for 30 min at room temperature. Fixed  
582 organoids were embedded in Histogel (Thermo scientific) and further processed into  
583 paraffin blocks. Immunostaining was performed according to standard immunostaining  
584 protocols. Anti-Ki67 (1:200, Cell Signaling Technology #9449) was used, and fluorescent  
585 images were taken on an LSM 780 confocal microscope (Zeiss). Ki67-positive cells were  
586 counted and expressed as a percentage of DAPI-positive cells.

587

## 588 **Quantification and statistical analysis**

589 The data were presented as means  $\pm$  SEM. All statistical analyses were performed using  
590 GraphPad Prism 5 software. Data obtained from the luciferase reporter assays, MTT  
591 assays, immunoblots, quantitative real-time RT-PCR experiments, organoid growth assays,  
592 and immunostaining experiments were analyzed using the Student's *t* test, ratio paired *t*

593 test, one-way Analysis of Variance (ANOVA), two-way ANOVA or repeated measures two-  
594 way ANOVA techniques with post-hoc Bonferroni corrections for multiple comparisons.  
595 p-values < 0.05 were considered statistically significant. Additional details and the p-  
596 values for statistical significance are described in the figure legends.

597 **Acknowledgments**

598 We would like to thank Dr. Hans Clevers for providing L-Wnt3a cells. This study was  
599 supported by grants from the National Research Foundation of Korea (NRF) funded by  
600 the Korean government (MSIT) (NRF-2017M3C7A1048090, NRF-2018R1A5A2025079  
601 and NRF-2019R1A2C3002354 to C.H.K.; NRF-2018R1A6A1A03023718 to J.L.;  
602 2021R1I1A1A01047269 to J.H.Y) and in part by a grant from Interpark Bio Convergence  
603 Corp., Seoul, Korea and a faculty research grant of Yonsei University College of Medicine  
604 (6-2017-0166).

605 **Author contributions**

606 J.L. and C.H.K. conceived and designed experiments. J.H.Y., S.S.K., Y.O.J., J.C., J.H., and J.Y.L.  
607 performed the experiments. J.H.Y., S.S.K., J.C., I.K., J.L., Y.O.J., and C.H.K. analyzed the data.  
608 J.C. and T.K. contributed reagents or materials. J.H.Y., S.S.K., J.C., I.K., J.L., Y.O.J., and C.H.K.  
609 wrote the paper.

610 **Data availability**

611 All data generated or analyzed for this study are included in the manuscript and  
612 supporting files; source data files have been provided for Figure 1-6.

613

614 **Declaration of interests**

615 C.H.K. is supported in part by a collaborative research grant from Interpark Bio  
616 Convergence Corp.

## 617 References

- 618 1 Logan, C. Y. & Nusse, R. The Wnt signaling pathway in development and disease. *Annu Rev*  
619 *Cell Dev Biol* **20**, 781-810, doi:10.1146/annurev.cellbio.20.010403.113126 (2004).
- 620 2 Nusse, R. & Clevers, H. Wnt/ $\beta$ -Catenin Signaling, Disease, and Emerging Therapeutic  
621 Modalities. *Cell* **169**, 985-999, doi:10.1016/j.cell.2017.05.016 (2017).
- 622 3 Zimmerman, Z. F., Moon, R. T. & Chien, A. J. Targeting Wnt pathways in disease. *Cold Spring*  
623 *Harb Perspect Biol* **4**, doi:10.1101/cshperspect.a008086 (2012).
- 624 4 Willert, K. *et al.* Wnt proteins are lipid-modified and can act as stem cell growth factors.  
625 *Nature* **423**, 448-452, doi:10.1038/nature01611 (2003).
- 626 5 Janda, C. Y., Waghray, D., Levin, A. M., Thomas, C. & Garcia, K. C. Structural basis of Wnt  
627 recognition by Frizzled. *Science* **337**, 59-64, doi:10.1126/science.1222879 (2012).
- 628 6 Willert, K. H. Isolation and application of bioactive Wnt proteins. *Methods Mol Biol* **468**, 17-  
629 29, doi:10.1007/978-1-59745-249-6\_2 (2008).
- 630 7 Lepperdinger, G., Brunauer, R., Jamnig, A., Laschober, G. & Kassem, M. Controversial issue: is  
631 it safe to employ mesenchymal stem cells in cell-based therapies? *Exp Gerontol* **43**, 1018-  
632 1023, doi:10.1016/j.exger.2008.07.004 (2008).
- 633 8 Tuschong, L., Soenen, S. L., Blaese, R. M., Candotti, F. & Muul, L. M. Immune response to  
634 fetal calf serum by two adenosine deaminase-deficient patients after T cell gene therapy.  
635 *Hum Gene Ther* **13**, 1605-1610, doi:10.1089/10430340260201699 (2002).
- 636 9 Selvaggi, T. A., Walker, R. E. & Fleisher, T. A. Development of antibodies to fetal calf serum  
637 with arthus-like reactions in human immunodeficiency virus-infected patients given  
638 syngeneic lymphocyte infusions. *Blood* **89**, 776-779 (1997).
- 639 10 Tüysüz, N. *et al.* Lipid-mediated Wnt protein stabilization enables serum-free culture of  
640 human organ stem cells. *Nat Commun* **8**, 14578, doi:10.1038/ncomms14578 (2017).
- 641 11 Clevers, H. Modeling Development and Disease with Organoids. *Cell* **165**, 1586-1597,  
642 doi:10.1016/j.cell.2016.05.082 (2016).
- 643 12 Sato, T. *et al.* Single Lgr5 stem cells build crypt-villus structures in vitro without a  
644 mesenchymal niche. *Nature* **459**, 262-265, doi:10.1038/nature07935 (2009).
- 645 13 Barker, N. *et al.* Lgr5(+ve) stem cells drive self-renewal in the stomach and build long-lived  
646 gastric units in vitro. *Cell Stem Cell* **6**, 25-36, doi:10.1016/j.stem.2009.11.013 (2010).
- 647 14 Ootani, A. *et al.* Sustained in vitro intestinal epithelial culture within a Wnt-dependent stem  
648 cell niche. *Nat Med* **15**, 701-706, doi:10.1038/nm.1951 (2009).
- 649 15 Sato, T. *et al.* Long-term expansion of epithelial organoids from human colon, adenoma,  
650 adenocarcinoma, and Barrett's epithelium. *Gastroenterology* **141**, 1762-1772,  
651 doi:10.1053/j.gastro.2011.07.050 (2011).
- 652 16 Sato, T. *et al.* Paneth cells constitute the niche for Lgr5 stem cells in intestinal crypts. *Nature*  
653 **469**, 415-418, doi:10.1038/nature09637 (2011).
- 654 17 van der Valk, J. *et al.* Fetal Bovine Serum (FBS): Past - Present - Future. *Altex* **35**, 99-118,

- 655 doi:10.14573/altex.1705101 (2018).
- 656 18 Fuerer, C., Habib, S. J. & Nusse, R. A study on the interactions between heparan sulfate  
657 proteoglycans and Wnt proteins. *Dev Dyn* **239**, 184-190, doi:10.1002/dvdy.22067 (2010).
- 658 19 Mihara, E. *et al.* Active and water-soluble form of lipidated Wnt protein is maintained by a  
659 serum glycoprotein afamin/ $\alpha$ -albumin. *Elife* **5**, doi:10.7554/eLife.11621 (2016).
- 660 20 Naschberger, A. *et al.* Structural Evidence for a Role of the Multi-functional Human  
661 Glycoprotein Afamin in Wnt Transport. *Structure* **25**, 1907-1915.e1905,  
662 doi:10.1016/j.str.2017.10.006 (2017).
- 663 21 Peters Jr, T. *All about albumin: biochemistry, genetics, and medical applications.* (Academic  
664 press, 1995).
- 665 22 Gross, J. C., Chaudhary, V., Bartscherer, K. & Boutros, M. Active Wnt proteins are secreted on  
666 exosomes. *Nat Cell Biol* **14**, 1036-1045, doi:10.1038/ncb2574 (2012).
- 667 23 Dhamdhare, G. R. *et al.* Drugging a stem cell compartment using Wnt3a protein as a  
668 therapeutic. *PLoS One* **9**, e83650, doi:10.1371/journal.pone.0083650 (2014).
- 669 24 Carmon, K. S., Gong, X., Lin, Q., Thomas, A. & Liu, Q. R-spondins function as ligands of the  
670 orphan receptors LGR4 and LGR5 to regulate Wnt/beta-catenin signaling. *Proc Natl Acad*  
671 *Sci U S A* **108**, 11452-11457, doi:10.1073/pnas.1106083108 (2011).
- 672 25 Wyatt, A. R., Yerbury, J. J., Ecroyd, H. & Wilson, M. R. Extracellular chaperones and  
673 proteostasis. *Annu Rev Biochem* **82**, 295-322, doi:10.1146/annurev-biochem-072711-163904  
674 (2013).
- 675 26 Low, B. E. & Wiles, M. V. A Humanized Mouse Model to Study Human Albumin and Albumin  
676 Conjugates Pharmacokinetics. *Methods Mol Biol* **1438**, 115-122, doi:10.1007/978-1-4939-  
677 3661-8\_7 (2016).
- 678 27 Bu, Q. *et al.* The crystal structure of full-length Sizzled from *Xenopus laevis* yields insights  
679 into Wnt-antagonistic function of secreted Frizzled-related proteins. *J Biol Chem* **292**, 16055-  
680 16069, doi:10.1074/jbc.M117.791756 (2017).
- 681 28 Liang, C. J. *et al.* SFRPs Are Biphasic Modulators of Wnt-Signaling-Elicited Cancer Stem Cell  
682 Properties beyond Extracellular Control. *Cell Rep* **28**, 1511-1525.e1515,  
683 doi:10.1016/j.celrep.2019.07.023 (2019).
- 684 29 Mulligan, K. A. *et al.* Secreted Wingless-interacting molecule (Swim) promotes long-range  
685 signaling by maintaining Wingless solubility. *Proc Natl Acad Sci U S A* **109**, 370-377,  
686 doi:10.1073/pnas.1119197109 (2012).

687



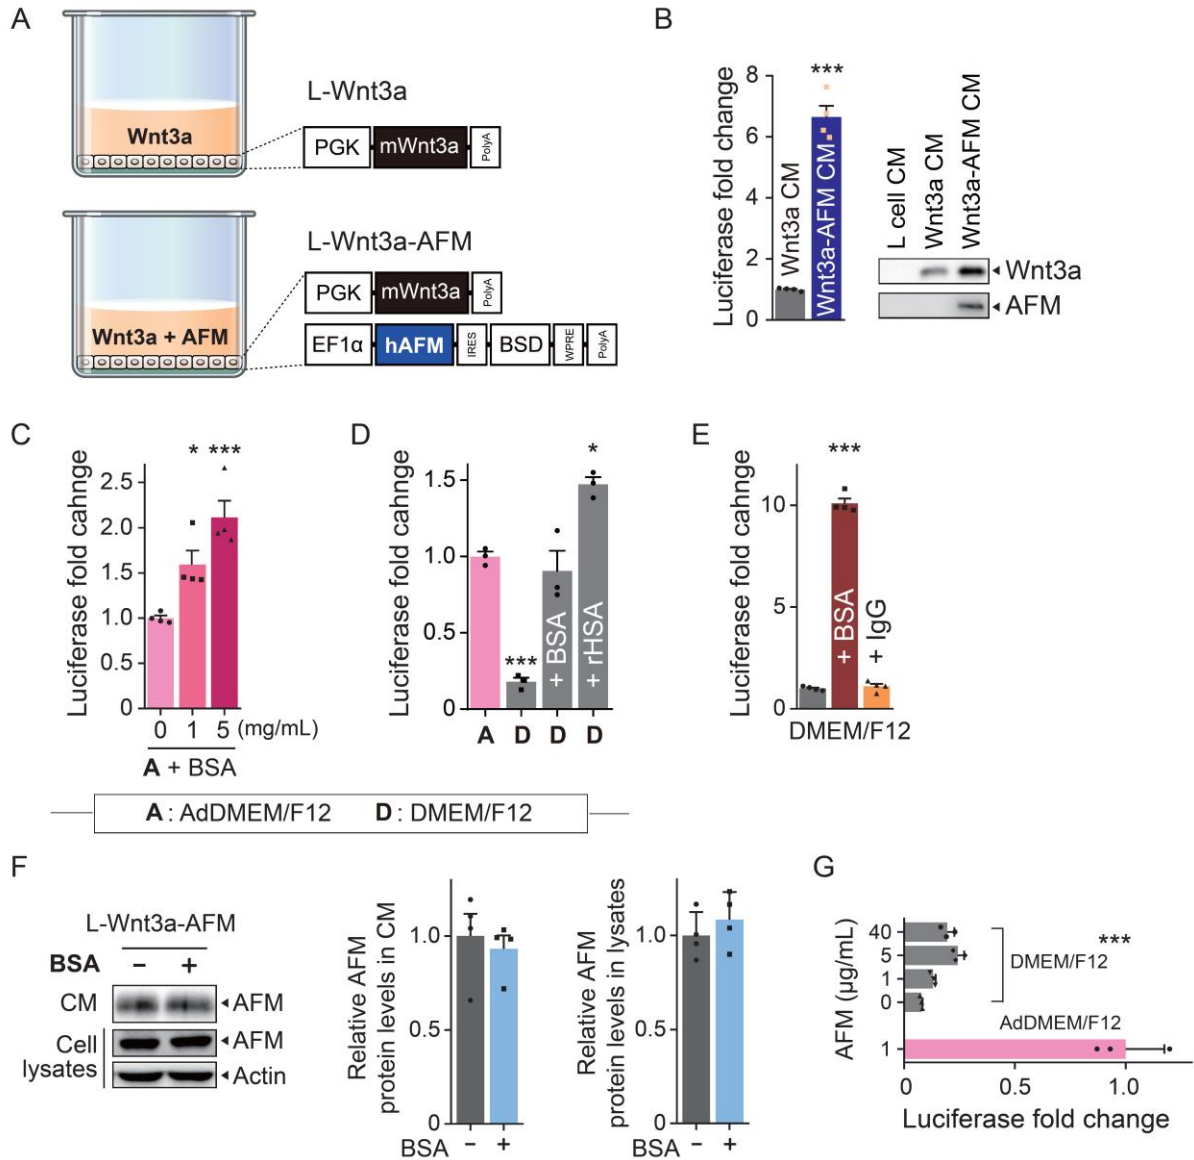

688  
 689 **Figure 1. SA is required to maintain the Wnt ligand activity of Wnt3a-AFM CM.** (A) L-  
 690 Wnt3a cells and L-Wnt3a cells transduced with lentivirus harboring pLVX-EF1 $\alpha$ -human AFM-  
 691 IRES-blasticidin-S deaminase (L-Wnt3a-AFM cells) were used to produce Wnt3a CM and  
 692 Wnt3a-AFM CM, respectively. The media were conditioned by each cell line for 5 days. (B)  
 693 TOPflash assays (luciferase reporter assays of the Wnt/ $\beta$ -catenin signaling pathway) were  
 694 performed with both Wnt3a CM and Wnt3a-AFM CM to compare their Wnt3a ligand activities.  
 695 The luciferase activity with Wnt3a CM stimulation was set to 1 (left). Along with L cell CM,  
 696 which was used as a negative control, Wnt3a CM and Wnt3a-AFM CM were subjected to anti-  
 697 Wnt3a and anti-AFM immunoblotting to compare their Wnt3a and AFM levels (right). \*\*\* $P$  <  
 698 0.001, unpaired Student's  $t$  test, compared to Wnt3a CM. (C) The effects of increasing  
 699 amounts of BSA on the Wnt3a ligand activity of Wnt3a-AFM CM were measured via TOPflash.  
 700 AdDMEM/F12: advanced DMEM/F12. \* $P$  < 0.05 and \*\*\* $P$  < 0.001 compared to A + BSA 0  
 701 CM; one-way ANOVA followed by post-hoc Bonferroni corrections for multiple comparisons.  
 702 The luciferase activity when stimulated by Wnt3a CM produced in AdDMEM/F12 was set to 1.  
 703 (D) TOPflash assays were used to measure the luciferase fold changes of Wnt3a-AFM CM  
 704 produced in DMEM/F12 compared to Wnt3a-AFM CM produced in AdDMEM/F12.  
 705 AdDMEM/F12 contains 0.4 mg/ml of BSA, whereas DMEM/F12 lacks BSA. Adding BSA (0.4  
 706 mg/mL) or rHSA (0.4 mg/mL) to Wnt3a-AFM CM (in DMEM/F12) restored Wnt3a ligand  
 707 activity. rHSA: recombinant human serum albumin. The luciferase activity when stimulated by

708 Wnt3a-AFM CM produced in AdDMEM/F12 was set to 1.  $*P < 0.05$ ,  $***P < 0.001$  compared to  
709 A (Wnt3a-AFM CM produced in AdDMEM/F12); one-way ANOVA followed by post-hoc  
710 Bonferroni corrections for multiple comparisons. (E) Comparison of Wnt3a protein activity  
711 resulting from adding either BSA (5 mg/mL) or IgG (5 mg/mL) to Wnt3a-AFM CM (in  
712 DMEM/F12). The luciferase activity of Wnt3a-AFM CM (in DMEM/F12) was used as a control  
713 and set to 1 on the Y-axis. IgG: Immunoglobulin-G.  $***P < 0.001$  compared to the control; one-  
714 way ANOVA followed by post-hoc Bonferroni corrections for multiple comparisons. (F) L-  
715 Wnt3a-AFM cells were grown in DMEM/F12 media for 5 days in the presence or absence of  
716 5 mg/mL BSA. AFM protein levels in both CM and cell lysates were measured using  
717 immunoblotting (left). Relative protein levels according to their immunoblotting band intensities  
718 are indicated in the bar graphs (right). (G) L-Wnt3a cells were grown in DMEM/F12 media for  
719 5 days with varying concentrations of added AFM. TOPflash assays were performed to  
720 measure the Wnt ligand activity of Wnt3a (+AFM) CM. The TOPflash activity of Wnt3a CM  
721 made in AdDMEM/F12 supplemented with 1  $\mu\text{g/mL}$  AFM was used as a control and set to 1  
722 on the Y-axis.  $***P < 0.001$  compared to the control, one-way ANOVA followed by post-hoc  
723 Bonferroni corrections for multiple comparisons. The data ( $n=3$  or 4 biological replicates) are  
724 presented as means  $\pm$  SEM.

725

726 **Figure supplement 1.** Formulation comparison between DMEM/F12 and AdDMEM/F12

727

728 **Figure supplement 2.** MTT assays in L-Wnt3a-AFM cells

729 L-Wnt3a-AFM cells were cultured in the indicated media for 5 days and then MTT assays  
730 were performed to measure cell viability or cell proliferation. (Left) BSA (1 or 5 mg/mL) was  
731 added to AdDMEM/F12 for 5 days. (Right) L-Wnt3a-AFM cells were cultured in  
732 AdDMEM/F12 or DMEM/F12.

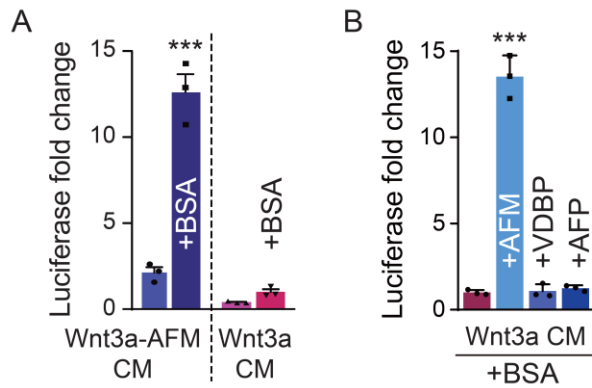

733  
734  
735  
736  
737  
738  
739  
740  
741  
742  
743  
744  
745  
746

**Figure 2. AFM is the only albumin superfamily protein member required for BSA's maintenance of Wnt3a activity in CM.** (A) The effect of exogenous BSA (5 mg/mL) on the Wnt3a ligand activity of Wnt3a-AFM CM (in DMEM/F12) (left) and Wnt3a CM (in DMEM/F12) (right) as measured via TOPflash assays. The luciferase activity when stimulated with Wnt3a (BSA+) CM produced in DMEM/F12 was set to 1. \*\*\* $P < 0.001$ , unpaired Student's  $t$  test, compared to Wnt3a (BSA+) CM. (B) The effect of exogenous co-administration of BSA (5 mg/mL) with AFM (5  $\mu$ g/mL), VDBP (50  $\mu$ g/mL), or AFP (10 ng/mL) on the Wnt3a ligand activities of Wnt3a CM (in DMEM/F12). BSA in combination with AFM, VDBP, or AFP was added to the final DMEM/F12 media change for L-Wnt3a cells when producing CM. The resulting CMs were subjected to TOPflash assays to measure their Wnt3a ligand activities. The luciferase activity when stimulated with Wnt3a (BSA+) CM was set to 1 on Y-axis. \*\*\* $P < 0.001$  compared to Wnt3a (BSA+) CM; one-way ANOVA followed by post-hoc Bonferroni corrections for multiple comparisons. The data ( $n=3$ ) are presented as means  $\pm$  SEM.

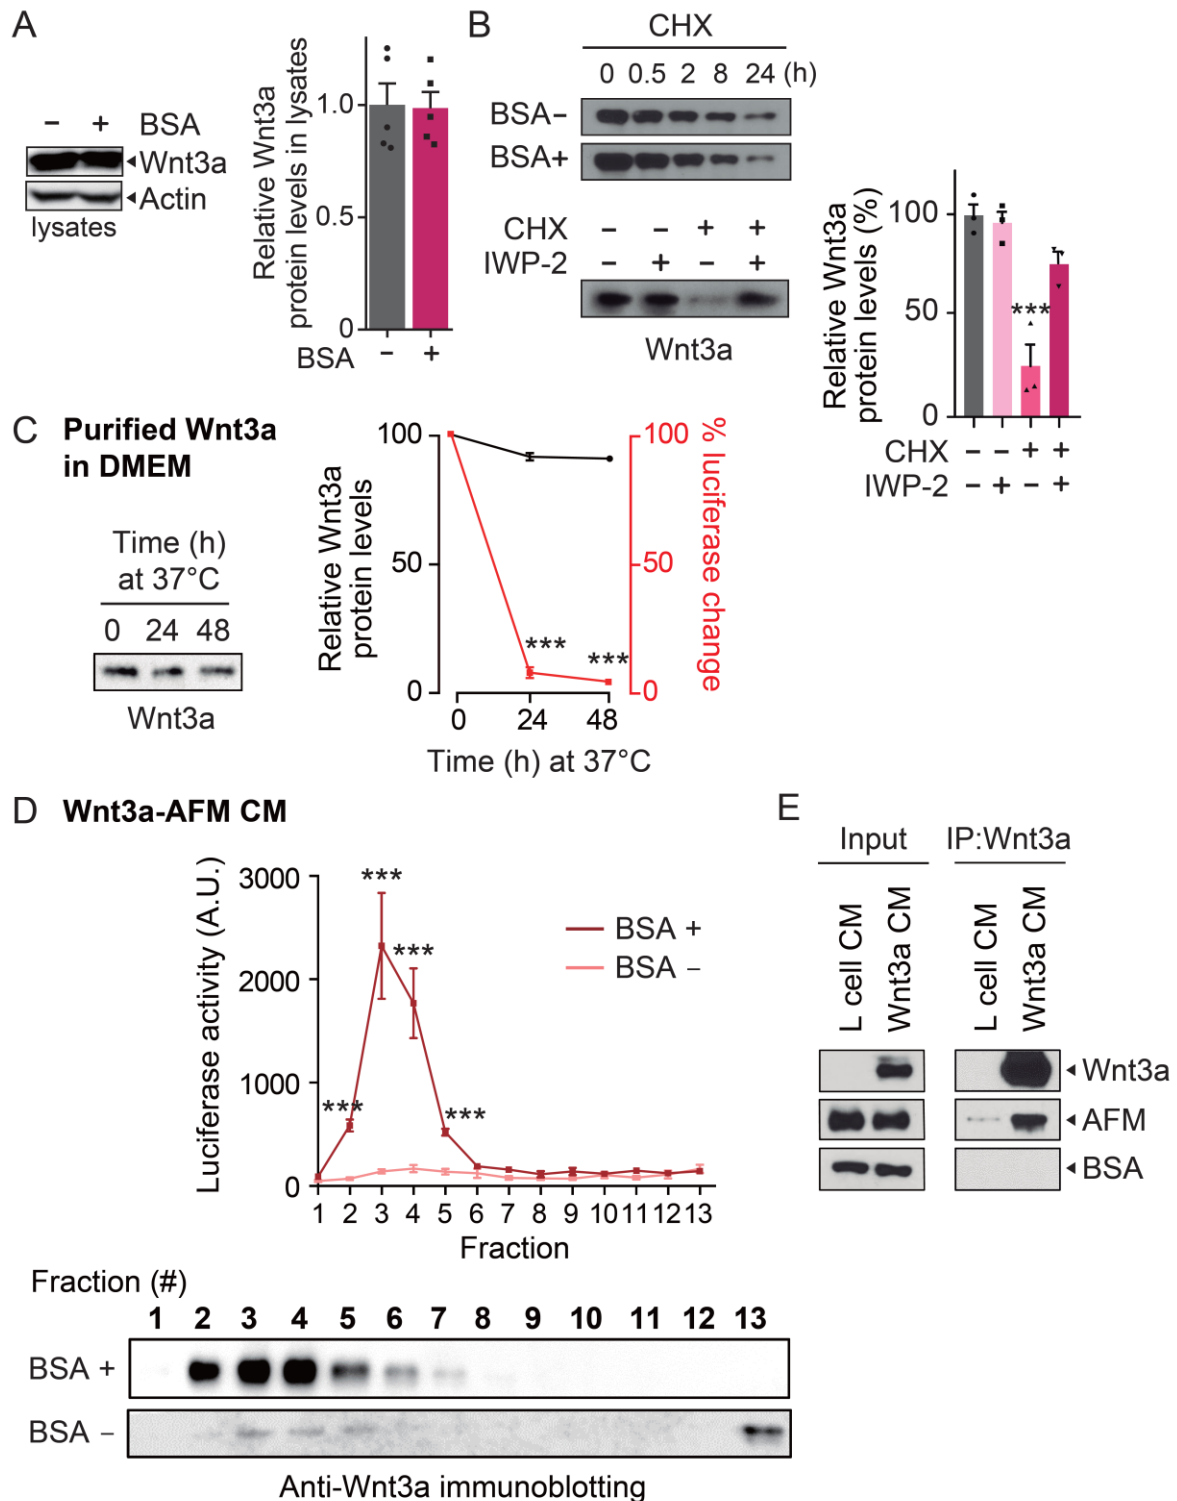

747  
748  
749  
750  
751  
752  
753  
754  
755

**Figure 3. SA solubilizes and stabilizes the Wnt3a-AFM complex.** (A) Wnt3a protein levels in the presence or absence of additional BSA (5 mg/mL) were measured via immunoblotting for Wnt3a in cell lysates (left). BSA was added to the media bathing L-Wnt3a-AFM cells for 5 days. The relative Wnt3a protein levels according to immunoblotting band intensities are indicated in bar graphs (right) and compared to the amount of Wnt3a in lysates of L-Wnt3a-AFM cells cultured in DMEM/F12 (BSA-) set to 1. Wnt3a-AFM (BSA-) CM via an unpaired Student's *t* test. (B) The protein synthesis inhibitor cycloheximide (CHX, 5  $\mu$ g/mL) was added to L-Wnt3a-AFM cells with or without BSA (5 mg/mL) for the indicated times. Changes in

756 intracellular Wnt3a protein levels over time were monitored using anti-Wnt3a antibodies  
757 (upper). In the absence of new protein synthesis, BSA did not affect Wnt3a levels. CHX (5  
758  $\mu\text{g}/\text{mL}$ ) and IWP-2 (5  $\mu\text{M}$ ), which is an inhibitor of Wnt processing and secretion, were added  
759 to L-Wnt3a-AFM cells for 15 hrs. The decrease in Wnt3a levels in the presence of CHX can  
760 be almost fully attributed due to the secretion of Wnt3a because IWP-2 treatment rescued the  
761 loss of Wnt3a protein caused by CHX treatment (lower). \*\*\* $P < 0.001$  compared to the CHX-,  
762 IWP-2- control, one-way ANOVA followed by post-hoc Bonferroni corrections for multiple  
763 comparisons. (C) Purified Wnt3a protein in DMEM/F12 was incubated for the indicated times  
764 at 37°C and changes in Wnt3a protein levels were measured via immunoblotting (left).  
765 Changes in Wnt3a protein levels and TOPflash activities are depicted in black and red,  
766 respectively, in a line graph (right). \*\*\* $P < 0.001$  compared to the zero-time control, one-way  
767 ANOVA followed by post-hoc Bonferroni corrections for multiple comparisons. (D) Wnt3a-AFM  
768 CM produced in the presence and absence of BSA were subjected to sucrose density gradient  
769 centrifugation and separated into 13 fractions. The lower numbers indicate the lower-density  
770 fractions containing soluble, monomeric or oligomeric Wnt3a; the higher numbers indicate the  
771 higher-density fractions containing aggregated, insoluble Wnt3a. Wnt3a ligand activity was  
772 measured in each of the 13 fractions using TOPflash assays (upper). The Wnt3a protein level  
773 in each fraction was measured via anti-Wnt3a immunoblotting (lower). \*\*\* $P < 0.001$  compared  
774 to Wnt3a-AFM (BSA-) CM at each fraction, repeated two-way ANOVA followed by post-hoc  
775 Bonferroni corrections for multiple comparisons. (E) L cell CM and Wnt3a CM were produced  
776 in cultures of L cells and L-Wnt3a cells which were incubated in DMEM/F12 supplemented  
777 with AFM 5  $\mu\text{g}/\text{mL}$  and BSA 5  $\text{mg}/\text{mL}$  for immunoprecipitation. L cell CM and Wnt3a CM were  
778 subjected to western blotting using anti-Wnt3a, anti-AFM, and anti-albumin antibodies as 2 %  
779 input controls. After immunoprecipitating L cell CM and Wnt3a CM with an anti-Wnt3a  
780 antibody, the immunoprecipitated proteins were subjected to western blotting using the same  
781 sets of antibodies. The data ( $n = 3-5$ ) are presented as means  $\pm$  SEM.  
782

783 **Figure Supplement 1. BSA does not affect Wnt3a secretion on exosomes**

784 (A) Exosomes were purified from CM produced in cultures of L-Wnt3a-AFM, L-Wnt3a, or L  
785 cells (as a negative control) with or without BSA (5  $\text{mg}/\text{mL}$ ). Differential centrifugation of CM  
786 separated it into  $\text{SN}_{\Delta}$  fractions and P100 exosome fraction. Western blotting for the  
787 exosome marker TSG101 confirmed that P100 was enriched with exosomes. Wnt3a was  
788 present in P100 pellets of L-Wnt3a or L-Wnt3a-AFM CM (based on DMEM/F12) along with  
789 its cargo protein GPR177 (Wntless). BSA did not affect the amount of Wnt3a and GPR177 in  
790 exosomes. (B) A quantification of Wnt3a and GPR177 in exosomes is depicted in bar  
791 graphs.

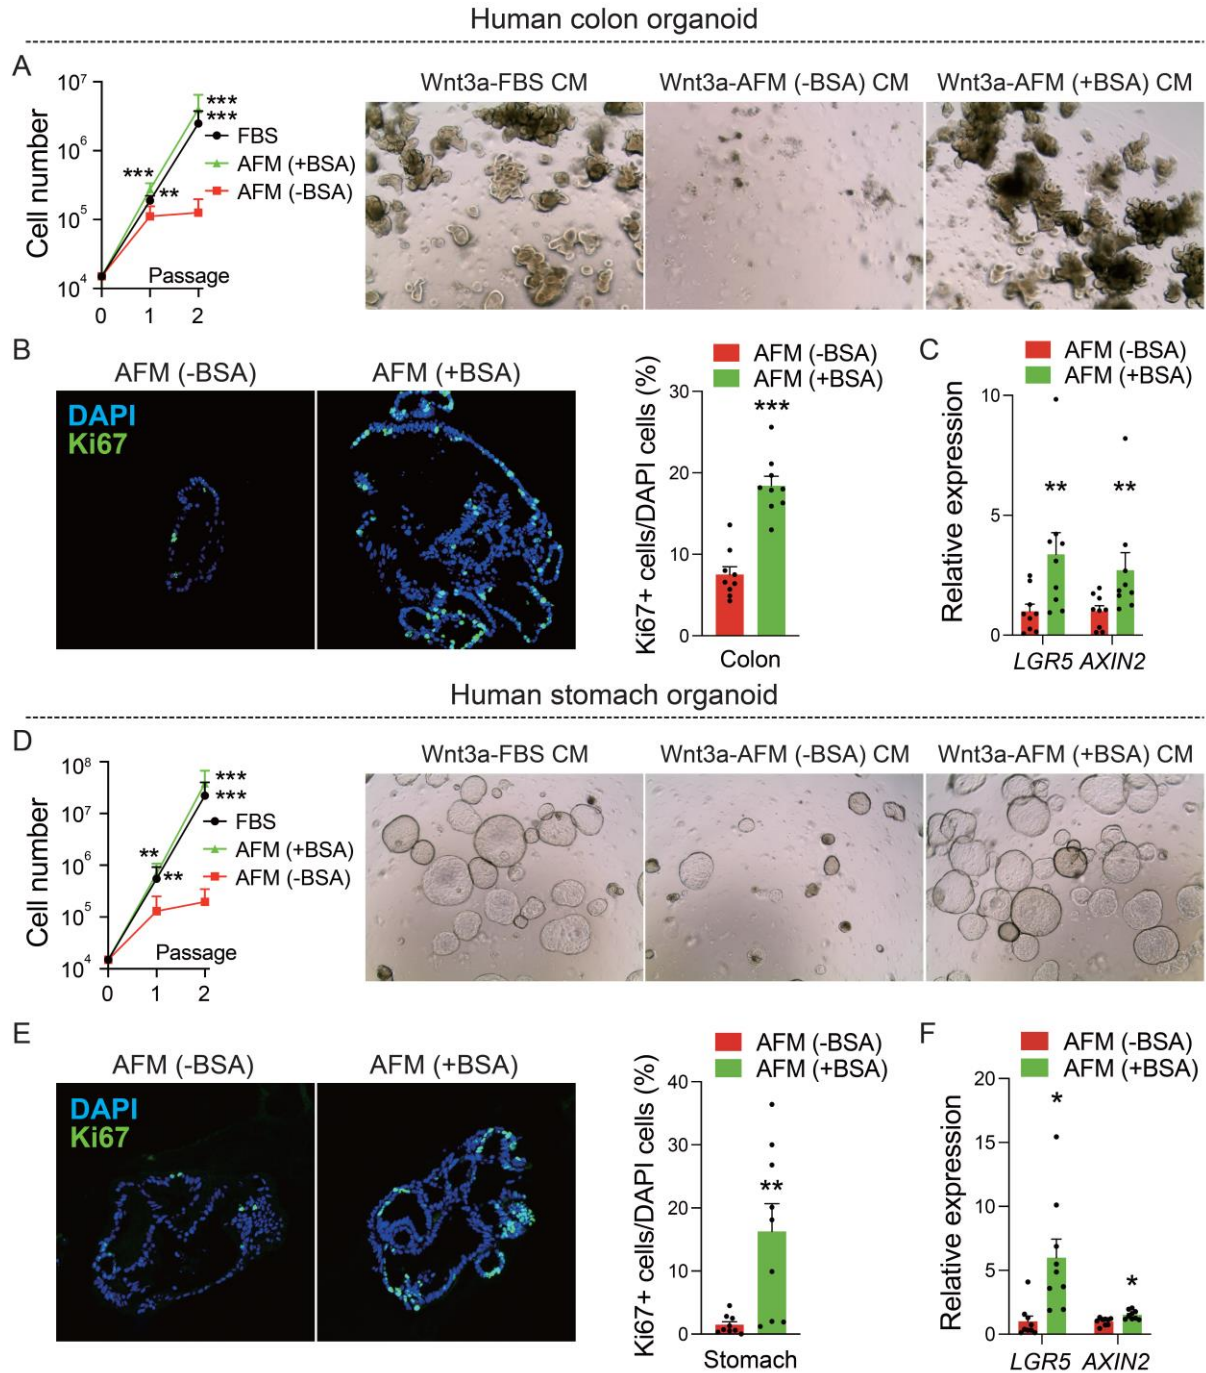

792

793

794 **Figure 4. Wnt3a-AFM CM needs BSA to support the growth and expansion of human**

795 **adult stem cell organoids.** (A, D) Growth rate of human colon or stomach organoids in the

796 following conditioned media: Wnt3a-FBS CM, Wnt3a-AFM (-BSA) CM, or Wnt3a-AFM (+BSA)

797 CM. The cells in each well were counted after each passage and the cumulative number of

798 cells at each passage was calculated by the equation in the methods section (left). Image of

799 organoids after 10 days of culture in the indicated conditioned media (right). \*\* $P < 0.01$  and

800 \*\*\* $P < 0.001$  compared to Wnt3a-AFM (-BSA) CM, repeated measures two-way ANOVA with

801 log-transformed data followed by post-hoc Bonferroni corrections for multiple comparisons.

802 (n=3 biological replicates) (B, E) Human colon or stomach organoids were immuno-stained

803 with the proliferation marker Ki67. Confocal images of fixed organoids processed into paraffin

804 blocks and then immuno-stained with Ki67 (green) and DAPI (blue) (left). The proportion of

805 Ki67+ cells among the DAPI+ cells was calculated and indicated in a graph (right). \*\* $P < 0.01$

805 and  $***P < 0.001$ , unpaired Student's *t* test, compared to Wnt3a-AFM (-BSA) CM. (n=9  
806 biological replicates) (C, F) Quantitative real-time RT-PCR was performed on cDNA  
807 synthesized from human colon or stomach organoids cultured in the indicated CM. Expression  
808 levels of the Wnt target genes *LGR5* and *AXIN2* were compared. The amount of mRNA (for  
809 both *LGR5* and *AXIN2*) when stimulated with Wnt3a-AFM (-BSA) was set to 1 on the Y-axis.  
810  $*P < 0.05$  and  $**P < 0.01$ , unpaired Student's *t* test, compared to Wnt3a-AFM (-BSA) CM. (n=9  
811 biological replicates) The data are presented as means  $\pm$  SEM.

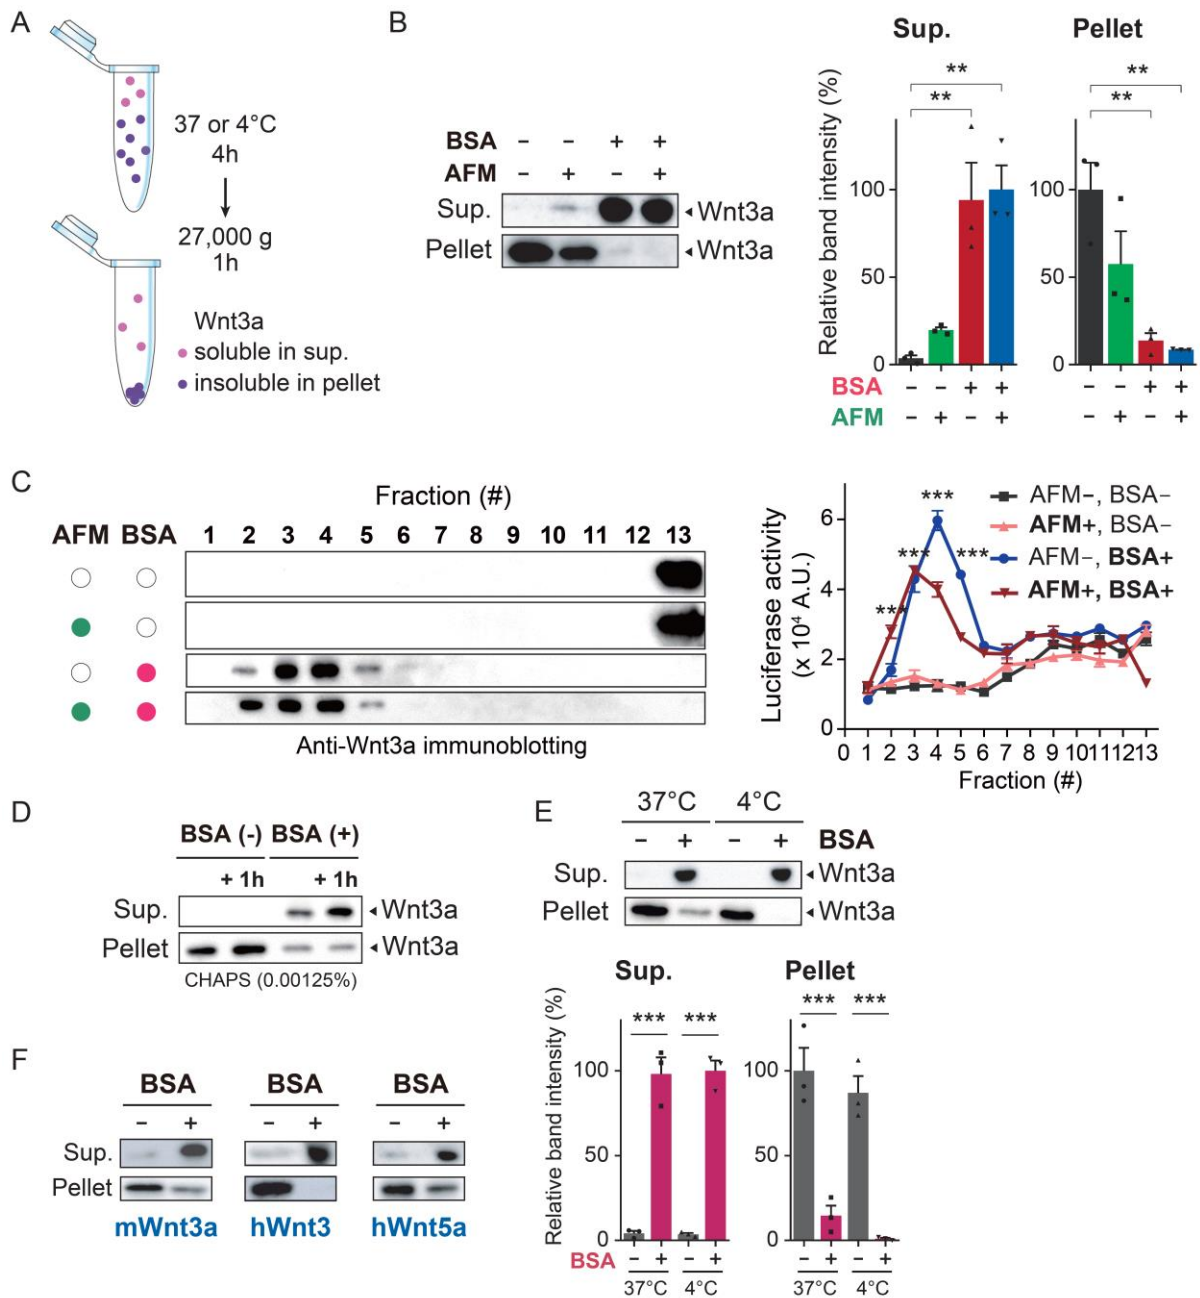

812  
813 **Figure 5. SA solubilizes and stabilizes purified Wnt3a in the absence of AFM.** (A) Purified  
814 Wnt3a proteins were incubated for 4 hrs in serum-free media (DMEM/F12) containing vehicle,  
815 AFM, or BSA at either 4°C or 37°C. Then, the solutions were centrifuged at 27,000 g for 1 hr  
816 at 4°C to separate soluble and insoluble Wnt3a. (B) Purified Wnt3a (200 µg/mL with 0.5%  
817 CHAPS) was added to a final concentration of 500 ng/mL in DMEM/F12 containing vehicle,  
818 BSA (5 mg/mL), or AFM (5 µg/mL). Then, the partitioning of Wnt3a into soluble or insoluble  
819 fractions was examined via anti-Wnt3a immunoblotting (left). Relative Wnt3a protein levels in  
820 supernatants and pellets are depicted in bar graphs (right). \*\**P* < 0.01 compared to BSA-/  
821 AFM- control, one-way ANOVA followed by post-hoc Bonferroni corrections for multiple  
822 comparisons. (C) Purified Wnt3a solution was subjected to sucrose density gradient  
823 centrifugation as in Figure 3D. The effects of adding BSA and/or AFM were examined. The  
824 Wnt3a ligand activity of each fraction was measured via TOPflash assays. \*\*\**P* < 0.001  
825 compared to the BSA-/AFM- control at each fraction, repeated two-way ANOVA followed by  
826 post-hoc Bonferroni corrections for multiple comparisons. (D) Purified Wnt3a (200 µg/mL with



827 0.5% CHAPS) was added to a final concentration of 500 ng/mL in 1 mL of DMEM/F12. BSA  
828 was added after aggregating the purified Wnt3a for 4 hrs. The solution was subjected to  
829 centrifugation to separate the supernatant and the pellet just after the addition of BSA, or after  
830 a 1 hr incubation with BSA. (E) The effect on Wnt3a solubility of adding BSA to purified Wnt3a  
831 solution at different temperatures was measured via anti-Wnt3a immunoblotting (upper).  
832 Relative Wnt3a protein levels are quantified and depicted in a graph (lower). \*\*\* $P < 0.001$   
833 compared to the BSA- control at each temperature, two-way ANOVA followed by post-hoc  
834 Bonferroni corrections for multiple comparisons. (F) BSA was added to solutions of multiple  
835 members of the Wnt protein family: mouse Wnt3a (mWnt3a), human Wnt3 (hWnt3a), and  
836 human Wnt5a (hWnt5a). Protein solubility was examined via a solubility assay as in (A) and  
837 the presence of Wnt proteins in the supernatant or in the pellet was determined via anti-Wnt3a  
838 immunoblotting. The data ( $n=3$  or 4) are presented as means  $\pm$  SEM.

839

840 **Figure supplement 1.** rHSA and BSA show similar effects on Wn3a solubility.

841 Purified Wnt3a (200  $\mu$ g/mL with 0.5% CHAPS) was added to a final concentration of 500  
842 ng/mL in DMEM/F12 containing vehicle, BSA (5 mg/mL), or rHSA (5 mg/mL). Then, the  
843 partitioning of Wnt3a into soluble or insoluble fractions was examined via anti-Wnt3a  
844 immunoblotting (left). Relative Wnt3a protein levels in supernatants and pellets are depicted  
845 in bar graphs (right). Data ( $n = 3$ ) are presented as means  $\pm$  SEM. \*\*\* $P < 0.001$  compared to  
846 BSA-, rHSA- control.

847

848 **Figure supplement 2.** BSA efficiently solubilizes Wnt3a even in trace amounts of CHAPS

849 Solubility assays were performed with purified Wnt3a co-incubated with different  
850 concentrations of CHAPS in the presence or absence of BSA (5 mg/mL). Supernatants  
851 (Sup.) and pellets were subjected to western blotting using anti-Wnt3a antibodies.

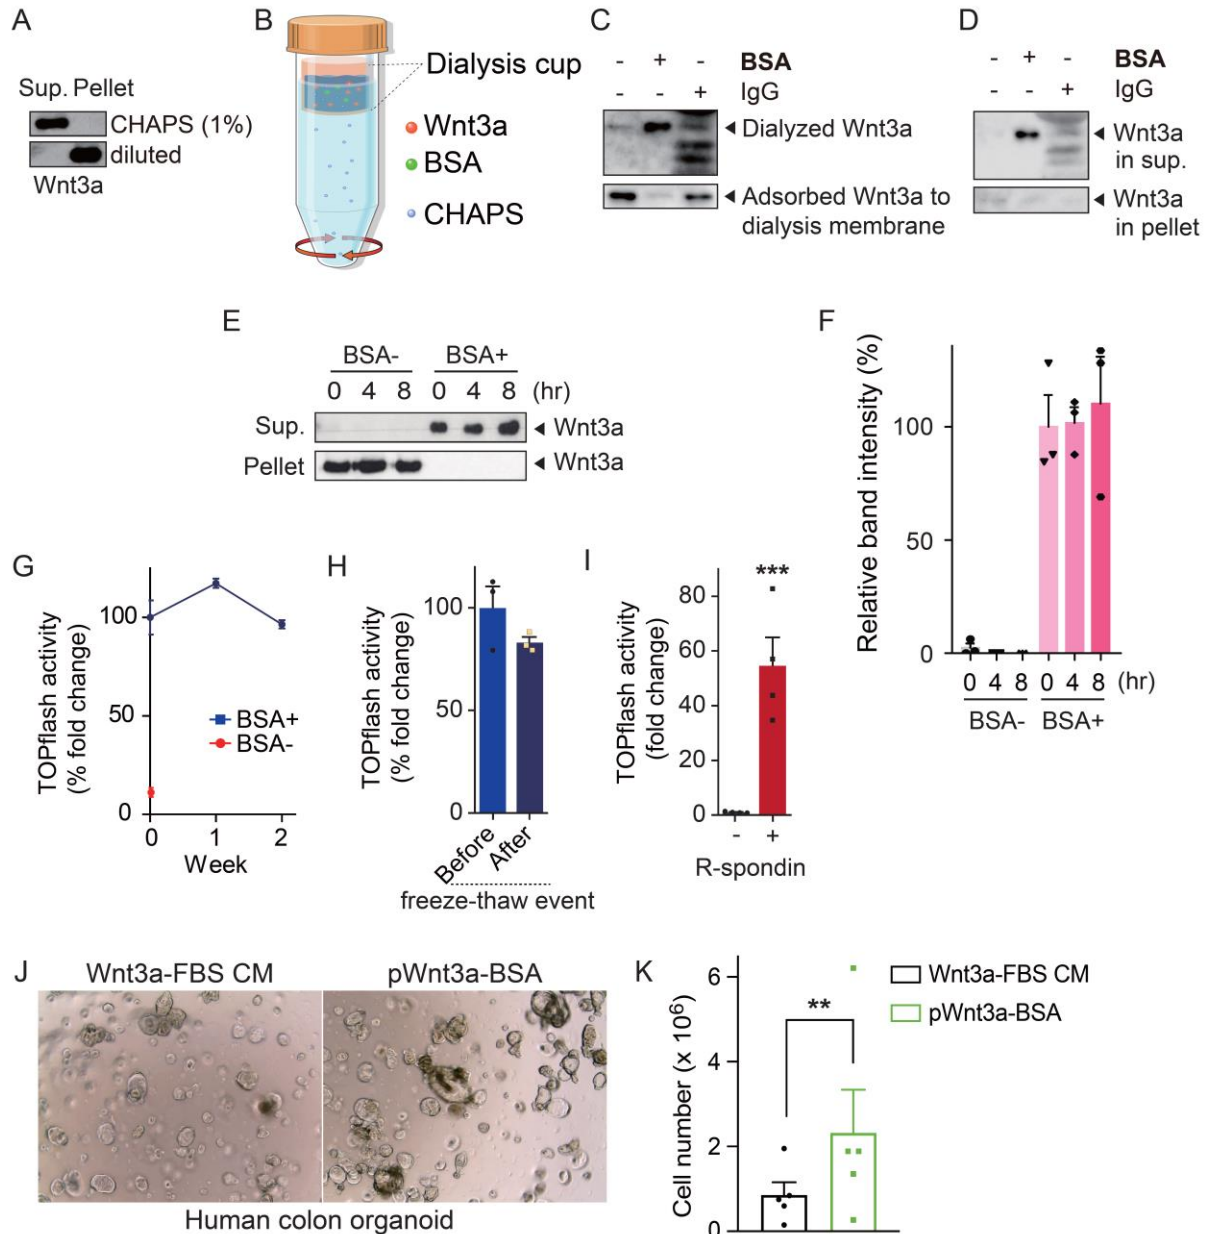

852

853

854

855

856

857

858

859

860

861

862

863

864

865

866

867

868

**Figure 6. A new method for solubilizing and maintaining purified Wnt3a in its active form in the absence of CHAPS.** (A) Adding 1% CHAPS to a purified Wnt3a protein solution maintains Wnt3a solubility. A solubility assay was performed on CHAPS-supplemented (1 %) and CHAPS-diluted (0.001 %) purified Wnt3a solutions as seen in Figure 5A. The protein that remained in the resulting supernatants and pellets was evaluated via anti-Wnt3a immunoblotting. (B) Purified Wnt3a protein (200  $\mu$ g/mL) containing 0.5% CHAPS was diluted in 2 mL of DMEM/F12 media supplemented with 5 mg/mL BSA. Then, 2 mL of the diluted purified Wnt3a was placed in a 10 kDa cut-off dialysis device. Dialysis was performed against DMEM/F12 media at 4°C for 48 hrs. (C) The effect of adding BSA (5 mg/mL) or IgG (5 mg/mL) to Wnt3a solutions before dialysis on the adsorption of Wnt3a to a dialysis membrane. Wnt3a proteins adsorbed to the dialysis membrane were recovered using 1X Laemmli sample buffer. (D) The effect of adding BSA or IgG to Wnt3a sample solutions before dialysis on their partitioning into supernatants or pellets in a solubility assay of the dialyzed samples. Anti-Wnt3a immunoblotting was performed with supernatants and pellets. (E, F) Purified Wnt3a (200  $\mu$ g/mL with 0.5% CHAPS) was added to a final concentration of 500 ng/mL to DMEM/F12 containing vehicle or BSA (5 mg/mL) and incubated for the indicated times at 37°C. Then, the

869 partitioning of Wnt3a into soluble or insoluble fractions was examined via anti-Wnt3a  
870 immunoblotting. Relative Wnt3a protein levels in supernatants are depicted in bar graphs. The  
871 band intensity of BSA+ 0 hr was set to 100. \*\*\* $P < 0.001$ , one-way ANOVA followed by post-  
872 hoc Bonferroni corrections for multiple comparisons, compared to corresponding BSA- time  
873 control. (G) Changes in TOPflash activities of purified Wnt3a dialyzed in the presence or  
874 absence of BSA (5 mg/mL), after being stored at 4°C for indicated wks, were monitored for 2  
875 wks. (H) Activities of dialyzed purified Wnt3a-BSA solutions (pWnt3a-BSA, 1 µg/mL) were  
876 tested via TOPflash assays after a freeze-thaw cycle. (I) Wnt ligand activities of pWnt3a-BSA  
877 solutions (1 µg/mL) measured via TOPflash assays after adding R-spondin1. The luciferase  
878 activity when stimulated with pWnt3a-BSA solution was set to 1. \*\*\* $P < 0.001$ , unpaired  
879 Student's  $t$  test, compared to solutions without R-spondin1. (J) Images of human colon  
880 organoids after 10 days of culture in indicated media. (K) Growth rate of human colon  
881 organoids in indicated media. Cell numbers of each well were counted and the cumulative  
882 number of cells after passage 2 was calculated by the equation mentioned in the method. \*\* $P$   
883  $< 0.01$ , ratio paired  $t$  test compared to Wnt3a-FBS CM. Data ( $n=3-5$  biological replicates) are  
884 presented as means  $\pm$  SEM.  
885  
886

887 **Figure supplement 1.** rHSA and BSA show similar effects on growth and expansion of human  
888 colon organoids

889 Growth rate of human colon organoids in indicated media (Wnt3a-FBS CM or pWnt3a-  
890 rHSA). Cell numbers of each well were counted and the cumulative number of cells after  
891 passage 2 was calculated by the equation mentioned in the Method. \*\* $P < 0.01$ , ratio paired  
892  $t$  test compared to Wnt3a-FBS CM. Data ( $n = 5$  biological replicates) are presented as  
893 means  $\pm$  SEM.

| Components*                    | C <sub>DMEM/F12</sub> (mg/L) | C <sub>Advanced DMEM/F12</sub> (mg/L) |
|--------------------------------|------------------------------|---------------------------------------|
| AlbuMAX® II                    | -                            | 400                                   |
| Insulin Recombinant Full Chain | -                            | 10                                    |
| Human Transferrin (Holo)       | -                            | 7.5                                   |
| Ascorbic Acid Phosphate        | -                            | 2.5                                   |
| Glutathione, Monosodium        | -                            | 1                                     |
| Sodium Selenite                | -                            | 0.005                                 |
| Ammonium Metavanadate          | -                            | 0.0003                                |
| Manganous Chloride             | -                            | 0.00005                               |
| L-Glutamine                    | 365                          | - **                                  |

894 \*The identical components in both media are not presented.

895 \*\*The same amount of L-glutamine was added when used in experiments

896

897 **Figure 1 - Figure supplement 1. Formulation comparison between DMEM/F12**

898 **and AddMEM/F12**

899

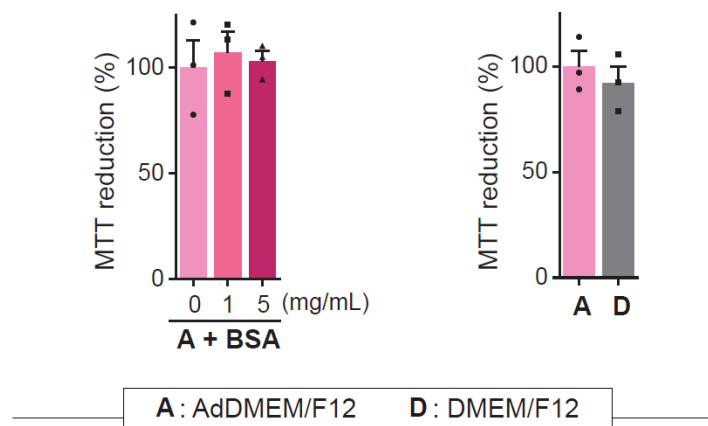

900

901 **Figure 1- Figure supplement 2. MTT assays in L-Wnt3a-AFM cells**

902

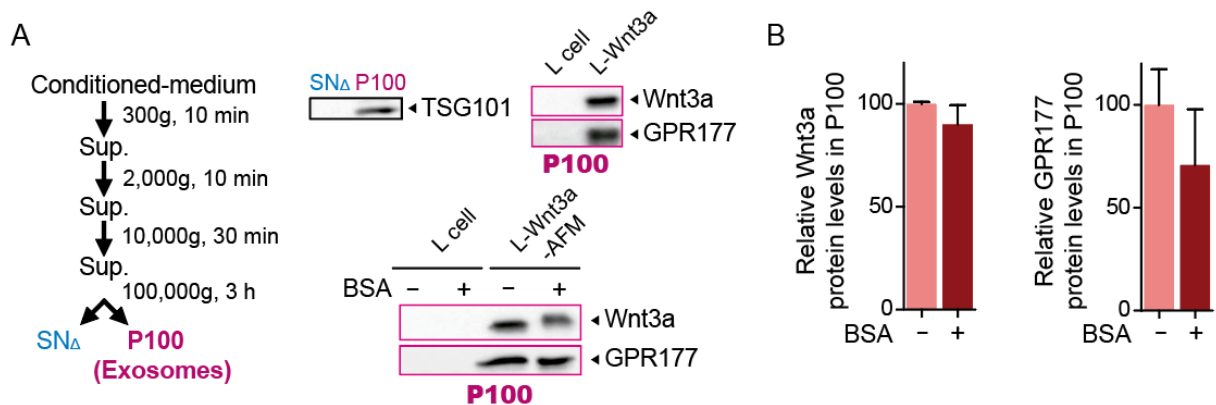

903

904 **Figure 3 – Figure supplement 1. BSA does not affect Wnt3a secretion on exosomes**

905

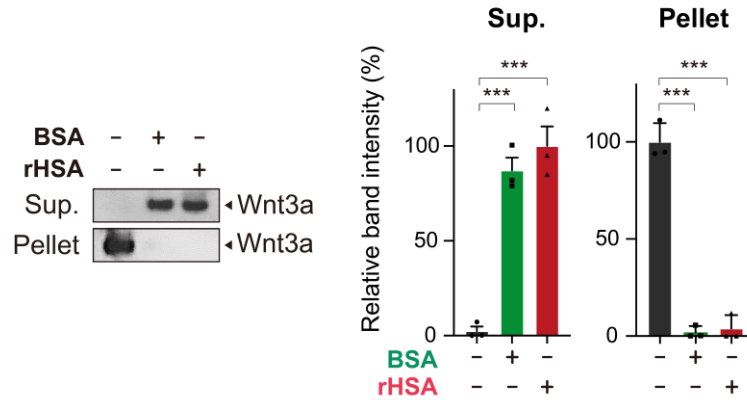

906

907 **Figure 5 – Figure supplement 1. rHSA and BSA show similar effects on Wnt3a**  
 908 **solubility**

909

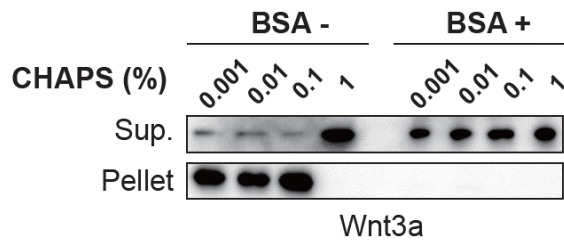

910

911 **Figure 5 – Figure supplement 2. BSA efficiently solubilizes Wnt3a even in trace**  
 912 **amounts of CHAPS**

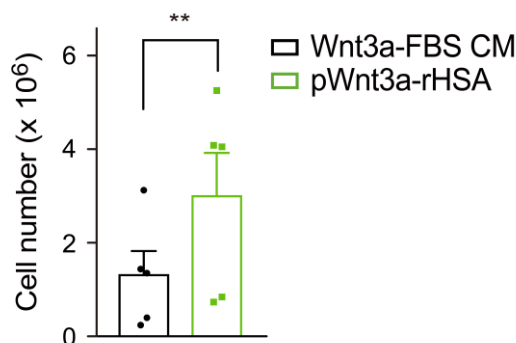

913

914 **Figure 6 – Figure supplement 1. rHSA and BSA show similar effects on growth and**  
 915 **expansion of human colon organoids**

916 **Source data – Figure 1-Source data 1. Raw data related to Figure 1B-1G; Original**  
917 **blots for Figure 1F**

918 **Source data – Figure 2-Source data 1. Raw data related to Figure 2A, B**

919 **Source data – Figure 3-Source data 1. Raw data related to Figure 3A-D; Original blots**  
920 **for Figure 3A-E**

921 **Source data – Figure 4-Source data 1. Raw data related to Figure 4A-F**

922 **Source data – Figure 5-Source data 1. Raw data related to Figure 5B, 5C and 5E;**  
923 **Original blots for Figure 5B-F**

924 **Source data – Figure 6-Source data 1. Raw data related to Figure 6F-I and 6K;**  
925 **Original blots for Figure 6A, 6C-E**
